1  
2  
3  
4  
5  
6  
7  
8  
9  
10  
11  
12  
13  
14  
15  
16  
17  
18  
19  
20  
21  
22  
23  
24  
25  
26  
27  
28  
29

## Depletion of microbiome-derived molecules in the host using *Clostridium* genetics

Chun-Jun Guo<sup>1</sup>, Breanna M. Allen<sup>2</sup>, Kamir J. Hiam<sup>2</sup>, Dylan Dodd<sup>3,4</sup>, Will van Treuren<sup>4</sup>, Steven Higginbottom<sup>4</sup>, Curt R. Fischer<sup>5</sup>, Justin L. Sonnenburg<sup>4</sup>, Matthew H. Spitzer<sup>2\*</sup>, Michael A. Fischbach<sup>1\*</sup>

<sup>1</sup>Department of Bioengineering and ChEM-H, Stanford University and Chan Zuckerberg Biohub, Stanford, CA 94305, USA

<sup>2</sup>Graduate Program in Biomedical Sciences, Departments of Otolaryngology and Microbiology & Immunology, Helen Diller Family Comprehensive Cancer Center, Parker Institute for Cancer Immunotherapy, University of California, San Francisco, San Francisco, CA 94143, USA

<sup>3</sup>Department of Pathology, Stanford University School of Medicine, Stanford, California 94305, USA

<sup>4</sup>Department of Microbiology and Immunology, Stanford University School of Medicine and Chan Zuckerberg Biohub, Stanford, California 94305, USA

<sup>5</sup>ChEM-H, Stanford University and Chan Zuckerberg Biohub, Stanford, CA 94305, USA

\*Correspondence: [fischbach@fischbachgroup.org](mailto:fischbach@fischbachgroup.org), [matthew.spitzer@ucsf.edu](mailto:matthew.spitzer@ucsf.edu)

30 **ABSTRACT**

31       **The gut microbiota produce hundreds of molecules that are present at high concentrations**  
32 **in circulation and whose levels vary widely among humans. In most cases, molecule production**  
33 **has not been linked to specific bacterial strains or metabolic pathways, and unraveling the**  
34 **contribution of each molecule to host biology remains difficult. A general system to ‘toggle’**  
35 **molecules in this pool on/off in the host would enable interrogation of the mechanisms by which**  
36 **they modulate host biology and disease processes. Such a system has been elusive due to**  
37 **limitations in the genetic manipulability of *Clostridium* and its relatives, the source of many**  
38 **molecules in this pool. Here, we describe a method for reliably constructing clean deletions in a**  
39 **model commensal *Clostridium*, *C. sporogenes* (Cs), including multiply mutated strains. We**  
40 **demonstrate the utility of this method by using it to ‘toggle’ off the production of ten Cs-derived**  
41 **molecules that accumulate in host tissues. By comparing mice colonized by wild-type Cs versus a**  
42 **mutant deficient in the production of branched short-chain fatty acids, we discover a previously**  
43 **unknown IgA-modulatory activity of these abundant microbiome-derived molecules. Our method**  
44 **opens the door to interrogating and sculpting a highly concentrated pool of chemicals from the**  
45 **microbiome.**

46 **MAIN TEXT**

47 Gut bacteria produce hundreds of diffusible molecules that are notable for four reasons: 1) Most  
48 have no host source, so their levels are determined predominantly or exclusively by the microbiome. 2)  
49 Many get into the bloodstream, so they can access peripheral tissues. 3) They often reach concentrations  
50 that approach or exceed what a typical drug reaches, and the concentration range can be large – more  
51 than an order of magnitude in many cases – so they have the potential to underlie biological differences  
52 among humans. 4) Several of these molecules are known to be ligands for key host receptors; additional  
53 compounds from this category are candidate ligands for, e.g., GPCRs and nuclear hormone receptors that  
54 play an important role in the host immune and metabolic systems (1). Thus, the gut microbiome is a prolific  
55 endocrine organ, but its output is not well understood.

56 The biological activities of most of these molecules remain unknown. One reason is that there has  
57 not been a general method for ‘togglng’ one or more of them on/off in the host, akin to a gene knockout  
58 experiment in a model organism. Such a method would open the door to interrogating – and ultimately  
59 controlling – one of the most concrete contributions gut bacteria make to host biology.

60 Previous efforts that have sought to study an individual microbiome-derived molecule in the setting  
61 of host colonization have used two main strategies: 1) Administering a compound by injection or gavage,  
62 which can offer insights into mechanism of action but suffers from the lack of a clean background (i.e.,  
63 existing physiologic levels of the molecule of interest) and the possible effects of differences in route and  
64 timing of administration relative to the native context of gut bacterial production. 2) Adding or removing a  
65 bacterial species that produces the molecule, which has the advantage of a more native-like context but  
66 makes it difficult to distinguish between molecule-induced phenotypes and other biological activities of the  
67 organism (2-4).

68 The most precise format for interrogating a microbiome-derived molecule is to compare two  
69 organisms that differ only in its production. Such an experiment has two threshold requirements: 1)  
70 knowledge of the metabolic genes for the molecule of interest, and 2) the ability to perform genetics in a  
71 robustly producing strain. This approach has been successful in *Bacteroides* (5, 6), *E. coli* (7), and  
72 *Lactobacillus* (8), but a key technical barrier limiting its generalization is that many of the known high-  
73 abundance gut-derived molecules are produced by *Clostridium* and its relatives, which have been difficult  
74 to manipulate genetically. We recently reported the use of a group II intron (9) to mutate a single pathway  
75 in *Clostridium sporogenes* (10), but this insertional mutagenesis system performs unpredictably and cannot  
76 be used to make strains that carry multiple mutations. Here, we address these challenges by developing  
77 a new CRISPR-Cas9-based system for constructing single and multiple mutants in a model gut-resident  
78 *Clostridium* species with high efficiency.

79  
80 **Selection of *C. sporogenes* as a model gut *Clostridium***

81 We chose *Clostridium sporogenes* ATCC 15579 (Cs) as a model gut commensal from the  
82 anaerobic Firmicutes for three reasons: This strain has long been known as a robust producer of high-  
83 abundance small molecules (11-13), it stably colonizes germ-free mice (3), and it is a commensal or  
84 mutualist (i.e., neither a pathogen nor a pathobiont). We began by performing metabolic profiling  
85 experiments to determine systematically the set of high-abundance small molecules produced by this strain  
86 *in vitro*. As shown in **Figures 1** and **3**, Cs produces ten molecules that are highly abundant and either  
87 primarily or exclusively derived from the gut microbiota: tryptamine, indole propionate and other aryl  
88 propionates, isobutyrate, 2-methylbutyrate, isovalerate, isocaproate, propionate, and butyrate, confirming  
89 previous studies (10-13); and trimethylamine and 5-aminovalerate, whose production by Cs has not  
90 previously been reported.

91

## 92 **Prediction and computational analysis of metabolic pathways**

93 Next, we sought to predict the genes responsible for producing each molecule. Metabolic genes  
94 for trimethylamine (14), tryptamine (13), and indole propionate (10) have been demonstrated using  
95 genetics in Cs or another gut bacterium; pathways for the remaining seven molecules had not been  
96 validated genetically in the gut microbiota. We made predictions for each one based on three sources of  
97 evidence (**Figure 1**): pathways validated in non-microbiome organisms (e.g., a pathway for 5-  
98 aminovalerate production from the terrestrial isolate *Clostridium sticklandii* (15)); biochemical studies that  
99 implicate an enzyme superfamily, which enabled us to search for orthologs in Cs (e.g., 2-  
100 hydroxyisocaproate dehydratases (16), which led us to a predicted cluster for isocaproate); and a  
101 metagenomic analysis of butyrate gene clusters (17), which yielded a predicted gene cluster for butyrate  
102 production in Cs.

103 We then set out to determine whether the metabolic genes we predicted are widely distributed in  
104 the human gut microbiome and actively transcribed under conditions of colonization, reasoning that both  
105 criteria would impact the generality of our studies. We used MetaQuery (18) to measure the abundance of  
106 the key genes in each pathway (colored red in **Figure S1**) in >2000 publicly available human gut  
107 metagenomes. Every gene except *tdcA* was present in >95% of the stool metagenomes, indicating that  
108 the predicted pathways are cosmopolitan (minimum abundance = 1 copy/1,000 cells) (**Figure S2**). Since  
109 the mere presence of a gene in a metagenome does not imply that it is transcribed, we determined the  
110 transcript abundance of the key metabolic genes (including close homologs from non-Cs genomes) by  
111 recruiting reads from nine publicly available RNA-sequencing data sets derived from stool samples of  
112 healthy subjects (19). This analysis revealed that multiple homologs of each pathway are highly transcribed  
113 under the condition of host colonization (**Figure S2**). For example, *porA* and its homologs – ALIPUT\_00387  
114 in *Alistipes putredinis* DSM 17216, BACSTE\_01839 from *Bacteroides stercoris* ATCC 43183, and  
115 BVU\_2313 from *Bacteroides vulgatus* ATCC 8482 – are transcribed robustly in at least one sample. Taken



116 together, these data suggest that the predicted pathways are widely distributed and actively transcribed  
117 under conditions of host colonization.

118

### 119 **Development of a new CRISPR-Cas9-based genetic system for *Cs***

120 Next, we tested our metabolic pathway predictions by constructing mutants in each of them, along  
121 with the known pathways in *Cs* for tryptamine (13), indole propionate (10), and trimethylamine (14) (**Figure**  
122 **1**). The genetic system we used previously, which is based on a group II intron (20), had two important  
123 limitations: 1) Since the intron's targeting mechanism is not well understood, generating one insertional  
124 mutant typically requires testing several targeting sequences; moreover, this process regularly fails to yield  
125 a mutant. 2) After multiple attempts, we were not able to recycle the antibiotic resistance marker using  
126 Clostron in order to create strains with multiple mutations; our experience is consistent with a previous  
127 report in the literature (9).

128 Reasoning that a dependable, markerless, recyclable genetic system for *Clostridium* would open  
129 the door to more systematic studies of microbiome metabolism, we developed a CRISPR/Cas9-based  
130 genome editing system for *Cs*. *Clostridium* species have been notoriously difficult to modify genetically,  
131 due in part to inefficient homologous recombination (21). We postulated that a Cas9-induced double-strand  
132 break would help select for a rare homologous recombination event. To this end, we constructed a single  
133 vector that includes all the essential components of a bacterial CRISPR-Cas9 system: the Cas9 gene, a  
134 guide RNA (gRNA), and a 1.5-2.5 kb repair template and transferred it by conjugation into *Cs*. However,  
135 we did not obtain viable colonies, even after multiple rounds of vector design modifications (see  
136 **Supplementary Text** for more detail).

137 Having observed that the conjugation efficiency for *Cs* is greatly diminished for plasmids >10 kb,  
138 we redesigned the system by splitting its components into two separate vectors: one that contains the  
139 gRNA and repair template, and another that harbors Cas9 under the control of a ferredoxin promoter  
140 (**Figures 2** and **S3**). When we introduced these plasmids sequentially, we failed to get any viable colonies  
141 after introducing the second vector that harbors Cas9 coding sequence. Reasoning that the efficiency of  
142 the second conjugation step could be the source of failure, we lengthened the donor/acceptor co-cultivation  
143 step of the second conjugal transfer from 24 to 72 h; this optimized protocol yielded reproducible, high-  
144 efficiency mutations at multiple test loci (see **Supplementary Text** for a more detailed description of the  
145 method's development).

146

### 147 **Constructing mutants to validate *Cs* pathways *in vitro***

148 We used the Cas9-based genetic system to construct deletion mutants in each of the 10 pathways.  
149 In each case, our repair template effected the removal of an 80-150 bp portion of the targeted gene in the  
150 *Cs* chromosome (**Figures 2B** and **S4**); for simplicity, the resulting mutants (e.g.,  $\Delta porA(330-409)$ ) are

151 referred to simply as  $\Delta porA$  (see **Table S4** for a list of deleted regions). We cultured each strain *in vitro*  
152 and analyzed culture extracts by LC-MS or GC-MS (depending on the analyte), yielding the following  
153 conclusions: (i) The production of each of the ten molecules is blocked by the corresponding pathway  
154 mutant (**Figures 3** and **S5**), validating our prediction set; an important exception is detailed below in (iii).  
155 (ii) Deleting one pathway does not appreciably alter the production of other molecules, indicating these  
156 pathways function independently *in vitro*. (iii) Our predicted genetic locus for the branched short-chain fatty  
157 acids (branched SCFAs) isobutyrate, 2-methylbutyrate, and isovalerate proved incorrect. In other  
158 organisms (e.g., *Streptomyces avermitilis* (22)), the branched-chain  $\alpha$ -ketoacid dehydrogenase complex  
159 (BCKDH) converts branched-chain amino acids (BCAAs) into branched SCFAs. To our surprise, deletion  
160 of the BCKDH gene CLOSPO\_03305 did not affect branched SCFA production. To our surprise, the  $\Delta porA$   
161 mutant – a gene we previously showed to be involved in the oxidative catabolism of aromatic amino acids  
162 (10) – proved to be deficient in the production of all three branched SCFAs (**Figure 3**). PorA is a member  
163 of the pyruvate:ferredoxin oxidoreductase (PFOR) superfamily; like the BCKDH, PFOR enzymes are  
164 thiamine-PP dependent, but they harbor an array of iron-sulfur clusters for electron transfer in place of  
165 lipoate and flavin, and reduce ferredoxin or flavodoxin instead of  $NAD^+$  (23). Although PFOR superfamily  
166 members are known to utilize pyruvate in anaerobic bacteria (generating acetate), their utilization of  
167 branched-chain  $\alpha$ -keto acids derived from BCAAs constitutes a non-canonical pathway for branched SCFA  
168 production, having only been observed in Archaea (24, 25). We found multiple *porA* homologs in the  
169 genomes of other human gut isolates that are highly transcribed in human stool metatranscriptomes,  
170 suggesting that this pathway could be a substantial contributor to the host branched SCFA pool (**Figures**  
171 **1, 3, and S2**).

172

### 173 ***In vivo* modulation of microbiome-derived small molecules using Cs mutants**

174 Having validated our target pathways *in vitro*, we set out to determine whether we could use these  
175 mutants to “toggle” off the production of each pathway product in the context of host colonization. For this  
176 experiment, we used a subset of five mutants. The first four were  $\Delta cutC$ ,  $\Delta prdA$ ,  $\Delta croA$ , and  $\Delta hadB$ ; for the  
177 fifth, we took advantage of the markerless nature of our CRISPR-based genetic system to construct a  
178  $\Delta porA/\Delta hadB$  double mutant, with the goal of eliminating the production of all four branched SCFAs  
179 (isobutyrate, 2-methylbutyrate, and isovalerate via  $\Delta porA$ , and isocaproate via  $\Delta hadB$ ). We mono-  
180 colonized germ-free mice with WT Cs and the five mutants (**Figure 1**); after four weeks, we sacrificed the  
181 mice and measured the concentration of each molecule in serum, urine, cecal contents, and fecal pellets.  
182 We drew three observations from these data: 1) Each metabolite (or its host metabolic product) was  
183 substantially reduced in the corresponding mutant (**Figure 4**). 2) The WT/mutant differences were smaller  
184 for isocaproate and butyrate due to a combination of two factors: low production by WT Cs relative to the  
185 native level of each molecule (usually mM), and a background level of the metabolite in mutant-colonized

186 mice, possibly due to a source of contaminating molecule in the chow. 3) The WT/mutant difference was  
187 especially large for the branched SCFAs isobutyrate, 2-methylbutyrate, and isovalerate, which form a pool  
188 of >2 mM in the cecal contents of WT Cs-associated mice that falls to near-baseline in the  $\Delta porA/\Delta hadB$ -  
189 associated animals. Overall, these data validate the utility and generality of using Cs mutants to deplete  
190 microbiome-derived molecules in the host, and they highlight that the presence of a pathway in an  
191 organism can lead to production levels that vary from native to orders of magnitude below. Thus, the choice  
192 of a producer organism that can support the biosynthesis of native metabolite levels depends on unknown  
193 factors beyond the mere presence of a corresponding pathway.

194

### 195 **Genetic control of microbiota metabolite production uncovers immune modulatory properties of** 196 **BSCFAs**

197 In light of our ability to ‘toggle’ off the Cs-derived small molecules *in vivo*, we returned to our original  
198 motivation for establishing the new genetic system: to study the role of microbiome-derived molecules in  
199 mediating microbe-host interactions. We chose the branched SCFAs for two reasons: (i) Like the  
200 conventional SCFAs acetate, propionate, and butyrate, they are highly abundant in the cecum and colon  
201 (concentrations in the mM range) (26); but unlike the SCFAs, which are known to modulate the host  
202 immune response via GPR41/43 (1), very little is known about the biology of the branched SCFAs. (ii) Cs  
203 produces them robustly; they constitute a pool of >2 mM (**Figure 4**). Hypothesizing that the branched  
204 SCFAs – like conventional SCFAs – might modulate the host immune response, we colonized germ-free  
205 mice with WT Cs and the  $\Delta porA/\Delta hadB$  mutant. After five weeks, we sacrificed the mice, isolated immune  
206 cells from the small intestine and mesenteric lymph nodes, and analyzed them by mass cytometry. WT-  
207 and  $\Delta porA/\Delta hadB$ -colonized mice were similar by broad metrics of immune function (e.g., total numbers of  
208 CD4<sup>+</sup> and CD8<sup>+</sup> T cells, B cells, and innate immune cells; percentages of effector cell subpopulations;  
209 cytokine levels). However, the  $\Delta porA/\Delta hadB$ -colonized mice had an increased number of immunoglobulin  
210 A (IgA)-producing plasma cells (**Figures 4D and S6**) and elevated levels of IgA bound to the surface of a  
211 variety of innate immune cells known to express IgA receptors: neutrophils, eosinophils, plasmacytoid and  
212 conventional dendritic cells, and classical and non-classical monocytes (**Figure 4E-F**). These results  
213 suggest a previously unrecognized role for the branched SCFAs in suppressing IgA production.

214

### 215 **Discussion**

216 The hundreds of microbiome-derived molecules that accumulate in circulation represent one of the  
217 most concrete modes of communication between the host and its microbiota. Remarkably little progress  
218 has been made in systematically studying their effects on host biology, due in part to the absence of a  
219 method that enables the selective depletion of one member of this pool. One approach to addressing this  
220 challenge is to colonize germ-free mice with a wild-type gut bacterial species versus a metabolite-deficient

221 mutant. Given the outsize role of *Clostridium* and related anaerobic Firmicutes in generating this pool of  
222 high-abundance metabolites, the lack of a reliable genetic system for commensal strains of *Clostridium*  
223 has been a key impediment to generalizing this approach. The system we introduce here is a first step  
224 toward that goal; it validates that genetics can be performed in a microbiome-derived *Clostridium* species  
225 rapidly, reliably, and without the need for a marker, and it demonstrates the utility of WT/mutant pairs for  
226 interrogating the host effects of microbiome-derived molecules. Given the versatility of Cas9, the key  
227 factors for generalizing this system to other *Clostridium* species are the ability to get DNA into a strain and  
228 the availability of replication origins for the plasmids that deliver the mutagenesis and repair elements. An  
229 alternative strategy would be to deliver Cas9 and the gRNA as a purified ribonucleoprotein, forgoing the  
230 need for plasmid-borne elements. Both strategies could expand the scope of Cas9-mediated mutagenesis  
231 to important but previously inaccessible Firmicutes such as butyrate producers from *Clostridium* clusters  
232 IV/XIVa (e.g., *Faecalibacterium prausnitzii*) (27), the bile acid metabolizers *C. scindens* and *C. hylemonae*  
233 (28), and the leanness-associated bacterium *Christensenella minuta* (29).

234 Cs is a prolific producer of amino acid metabolites, and our *in vitro* studies show that we can  
235 predictably block each pathway. However, one of the most striking observations is the difference in the  
236 concentration of each pathway product in the context of host colonization. 5-aminovalerate, indole  
237 propionate, isobutyrate, 2-methylbutyrate, isovalerate, propionate, and trimethylamine-*N*-oxide (TMAO)  
238 are produced robustly *in vivo* whereas isocaproate and butyrate are generated at 10-100-fold below the  
239 native concentration range. By highlighting that the mere presence of a pathway does not imply that it will  
240 function robustly in the host, our data raise questions about computational approaches that predict  
241 metabolic function based on gene or transcript levels (30, 31), and they suggest the importance of  
242 understanding pathway regulation and substrate availability under conditions of colonization by a complex  
243 native community.

244 The conventional SCFAs acetate, propionate, and butyrate modulate host immune function and  
245 induce regulatory T cells via a pair of GPCRs, GPR41/43. Though they are also predominantly microbiome-  
246 derived and present at high concentration (26), much less is known about the branched SCFAs isobutyrate,  
247 2-methylbutyrate, and isovalerate. Isovalerate was recently shown to be a ligand for Olfr558, a GPCR in  
248 enterochromaffin cells that controls the secretion of serotonin (32). Our data uncover a novel role for the  
249 branched SCFA pathway in modulating the production of IgA, the predominant mucosally secreted  
250 antibody (33) whose mechanisms of microbiome modulation are an active area of study (34-36). In light of  
251 the fact that the conventional SCFAs have been shown to exert the opposite effect – induction of IgA-  
252 producing B cells (37) – it will be of interest to determine the molecular mechanism by which the branched  
253 SCFAs act, which could represent a novel point of control for a component of the adaptive immune  
254 response that is fundamentally important to host-microbe interactions at mucosal interfaces.

255

256 **REFERENCES**

- 257 1. M. G. Rooks, W. S. Garrett, Gut microbiota, metabolites and host immunity. *Nat. Rev. Immunol.*  
258 **16**, 341–352 (2016).
- 259 2. P. M. Smith *et al.*, The Microbial Metabolites, Short-Chain Fatty Acids, Regulate Colonic Treg Cell  
260 Homeostasis. *Science (New York, N.Y.)* **341**, 569–573 (2013).
- 261 3. Y. Furusawa *et al.*, Commensal microbe-derived butyrate induces the differentiation of colonic  
262 regulatory T cells. *Nature*. **504**, 446–450 (2013).
- 263 4. L. Zhao *et al.*, Gut bacteria selectively promoted by dietary fibers alleviate type 2 diabetes.  
264 *Science (New York, N.Y.)* **359**, 1151–1156 (2018).
- 265 5. A. S. Devlin *et al.*, Modulation of a Circulating Uremic Solute via Rational Genetic Manipulation of  
266 the Gut Microbiota. *Cell Host & Microbe*. **20**, 709–715 (2016).
- 267 6. S. K. Mazmanian, H. L. Cui, A. O. Tzianabos, D. L. Kasper, An immunomodulatory molecule of  
268 symbiotic bacteria directs maturation of the host immune system. *Cell*. **122**, 107–118 (2005).
- 269 7. K. A. Romano *et al.*, Metabolic, Epigenetic, and Transgenerational Effects of Gut Bacterial Choline  
270 Consumption. *Cell Host & Microbe*. **22**, 279–290.e7 (2017).
- 271 8. C. M. Thomas *et al.*, Histamine derived from probiotic lactobacillus reuteri suppresses tnf via  
272 modulation of pka and erk signaling. *PLoS ONE*. **7** (2012), doi:10.1371/journal.pone.0031951.
- 273 9. S. A. Kuehne, J. T. Heap, C. M. Cooksley, S. T. Cartman, N. P. Minton, Clostron-mediated  
274 engineering of Clostridium. *Methods Mol. Biol.* **765**, 389–407 (2011).
- 275 10. D. Dodd *et al.*, A gut bacterial pathway metabolizes aromatic amino acids into nine circulating  
276 metabolites. *Nature*. **551**, 648–652 (2017).
- 277 11. S. R. Elsdén, M. G. Hilton, J. M. Waller, The end products of the metabolism of aromatic amino  
278 acids by clostridia. *Archives of microbiology*. **107**, 283–288 (1976).
- 279 12. S. R. Elsdén, M. G. Hilton, Volatile acid production from threonine valine leucine and isoleucine by  
280 Clostridia. *Archives of microbiology*. **117**, 165–172 (1978).
- 281 13. B. B. Williams *et al.*, Discovery and Characterization of Gut Microbiota Decarboxylases that Can  
282 Produce the Neurotransmitter Tryptamine. *Cell Host & Microbe*. **16**, 495–503 (2014).
- 283 14. A. Martínez-del Campo *et al.*, Characterization and detection of a widely distributed gene cluster  
284 that predicts anaerobic choline utilization by human gut bacteria. *MBio*. **6**, e00042–15 (2015).
- 285 15. U. C. Kabisch *et al.*, Identification of D-proline reductase from Clostridium sticklandii as a  
286 selenoenzyme and indications for a catalytically active pyruvoyl group derived from a cysteine  
287 residue by cleavage of a proprotein. *Journal of Biological Chemistry*. **274**, 8445–8454 (1999).
- 288 16. J. Kim, M. Hetzel, C. D. Boiangiu, W. Buckel, “Dehydration of (R)-2-hydroxyacyl-CoA to enoyl-CoA  
289 in the fermentation of  $\alpha$ -amino acids by anaerobic bacteria” (2004),,  
290 doi:10.1016/j.femsre.2004.03.001.
- 291 17. M. Vital, A. C. Howe, J. M. Tiedje, Revealing the Bacterial Synthesis Pathways by Analyzing  
292 (Meta) Genomic Data. *MBio*. **5**, 1–11 (2014).



- 293 18. S. Nayfach, M. A. Fischbach, K. S. Pollard, MetaQuery: a web server for rapid annotation and  
294 quantitative analysis of specific genes in the human gut microbiome. *Bioinformatics*. **31**, 3368–  
295 3370 (2015).
- 296 19. L. A. David *et al.*, Diet rapidly and reproducibly alters the human gut microbiome. *Nature*. **505**,  
297 559–563 (2014).
- 298 20. J. T. Heap, O. J. Pennington, S. T. Cartman, N. P. Minton, A modular system for Clostridium  
299 shuttle plasmids. *Journal of microbiological methods*. **78**, 79–85 (2009).
- 300 21. J. T. Heap, O. J. Pennington, S. T. Cartman, G. P. Carter, N. P. Minton, The ClosTron: A universal  
301 gene knock-out system for the genus Clostridium (2007), doi:10.1016/j.mimet.2007.05.021.
- 302 22. C. D. Denoya *et al.*, A second branched-chain alpha-keto acid dehydrogenase gene cluster  
303 (bkdFGH) from *Streptomyces avermitilis*: its relationship to avermectin biosynthesis and the  
304 construction of a bkdF mutant suitable for the production of novel antiparasitic avermectins.  
305 *Journal of bacteriology*. **177**, 3504–3511 (1995).
- 306 23. E. Chabrière *et al.*, Crystal structures of the key anaerobic enzyme pyruvate ferredoxin  
307 oxidoreductase free and in complex with pyruvate. *Nature Structural Biology*. **6**, 182–190 (1999).
- 308 24. J. Heider, X. Mai, M. W. Adams, Characterization of 2-ketoisovalerate ferredoxin oxidoreductase,  
309 a new and reversible coenzyme A-dependent enzyme involved in peptide fermentation by  
310 hyperthermophilic archaea. *Journal of bacteriology*. **178**, 780–787 (1996).
- 311 25. K. Ma, A. Hutchins, S. J. Sung, M. W. Adams, Pyruvate ferredoxin oxidoreductase from the  
312 hyperthermophilic archaeon, *Pyrococcus furiosus*, functions as a CoA-dependent pyruvate  
313 decarboxylase. *Proceedings of the National Academy of Sciences of the United States of*  
314 *America*. **94**, 9608–9613 (1997).
- 315 26. J. H. Cummings, E. W. Pomare, W. J. Branch, C. P. Naylor, G. T. MacFarlane, Short chain fatty  
316 acids in human large intestine, portal, hepatic and venous blood. *Gut*. **28**, 1221–1227 (1987).
- 317 27. S. E. Pryde, S. H. Duncan, G. L. Hold, C. S. Stewart, H. J. F. Å, The microbiology of butyrate  
318 formation in the human colon - 133.full.pdf. *FEMS microbiology letters*. **217**, 133–139 (2002).
- 319 28. J. M. Ridlon, S. C. Harris, S. Bhowmik, D.-J. Kang, P. B. Hylemon, Consequences of bile salt  
320 biotransformations by intestinal bacteria. *Gut Microbes*. **7**, 22–39 (2016).
- 321 29. J. K. Goodrich *et al.*, Human Genetics Shape the Gut Microbiome. *Cell*. **159**, 789–799 (2014).
- 322 30. M. G. I. Langille *et al.*, Predictive functional profiling of microbial communities using 16S rRNA  
323 marker gene sequences. *Nature biotechnology*. **31**, 814–821 (2013).
- 324 31. J. Kaminski *et al.*, High-Specificity Targeted Functional Profiling in Microbial Communities with  
325 ShortBRED. *PLOS Comput Biol*. **11**, e1004557 (2015).
- 326 32. N. W. Bellono *et al.*, Enterochromaffin Cells Are Gut Chemosensors that Couple to Sensory  
327 Neural Pathways. *Cell*. **170**, 185–198.e16 (2017).
- 328 33. A. J. MacPherson, K. D. McCoy, F. E. Johansen, P. Brandtzaeg, “The immune geography of IgA  
329 induction and function” (2008), pp. 11–22.

- 330 34. J. D. Planer *et al.*, Development of the gut microbiota and mucosal IgA responses in twins and  
331 gnotobiotic mice. *Nature*. **534** (2016), doi:10.1038/nature17940.
- 332 35. A. L. Kau *et al.*, Functional characterization of IgA-targeted bacterial taxa from malnourished  
333 Malawian children that produce diet-dependent enteropathy HHS Public Access. *Sci Transl Med*  
334 *February*. **25**, 276–224 (2015).
- 335 36. J. J. Bunker *et al.*, Natural polyreactive IgA antibodies coat the intestinal microbiota. *Science (New*  
336 *York, N.Y.* **358** (2017), doi:10.1126/science.aan6619.
- 337 37. M. Kim, Y. Qie, J. Park, C. H. Kim Correspondence, Gut Microbial Metabolites Fuel Host Antibody  
338 Responses. *Cell Host & Microbe*. **20**, 202–214 (2016).
- 339 38. A. de Jong, H. Pietersma, M. Cordes, O. P. Kuipers, J. Kok, PePPER: a webserver for prediction  
340 of prokaryote promoter elements and regulons. *BMC Genomics*. **13** (2012), doi:10.1186/1471-  
341 2164-13-299.

342

343

#### 344 **ACKNOWLEDGMENTS**

345 We are deeply indebted to members of the Fischbach Group for helpful suggestions and comments  
346 on the manuscript. This work was supported by an HHMI-Simons Faculty Scholar Award (M.A.F.); a  
347 Fellowship for Science and Engineering from the David and Lucile Packard Foundation (M.A.F.); an  
348 Investigators in the Pathogenesis of Infectious Disease award from the Burroughs Wellcome Foundation  
349 (M.A.F.); an award from BASF (M.A.F.); an award from the Leducq Foundation (M.A.F.); NIH grants  
350 DK110174 (M.A.F.), DK113598 (M.A.F.), DK101674 (M.A.F. and J.L.S.), OD023056 (M.H.S.), OD018040  
351 (UCSF, to acquire the mass cytometer used in this study), DK110335 (D.D.), and DK085025 (J.L.S.); the  
352 Chan Zuckerberg Biohub (M.A.F. and J.L.S.); support from Stanford's ChEM-H Institute (C.R.F.); and  
353 support from the Parker Institute for Cancer Immunotherapy (M.H.S.).

354

#### 355 **SUPPLEMENTARY MATERIALS**

356 Materials and Methods

357 Supplementary Text

358 Figure S1 – S6

359 Table S1 – S4

360 References 1 – 13

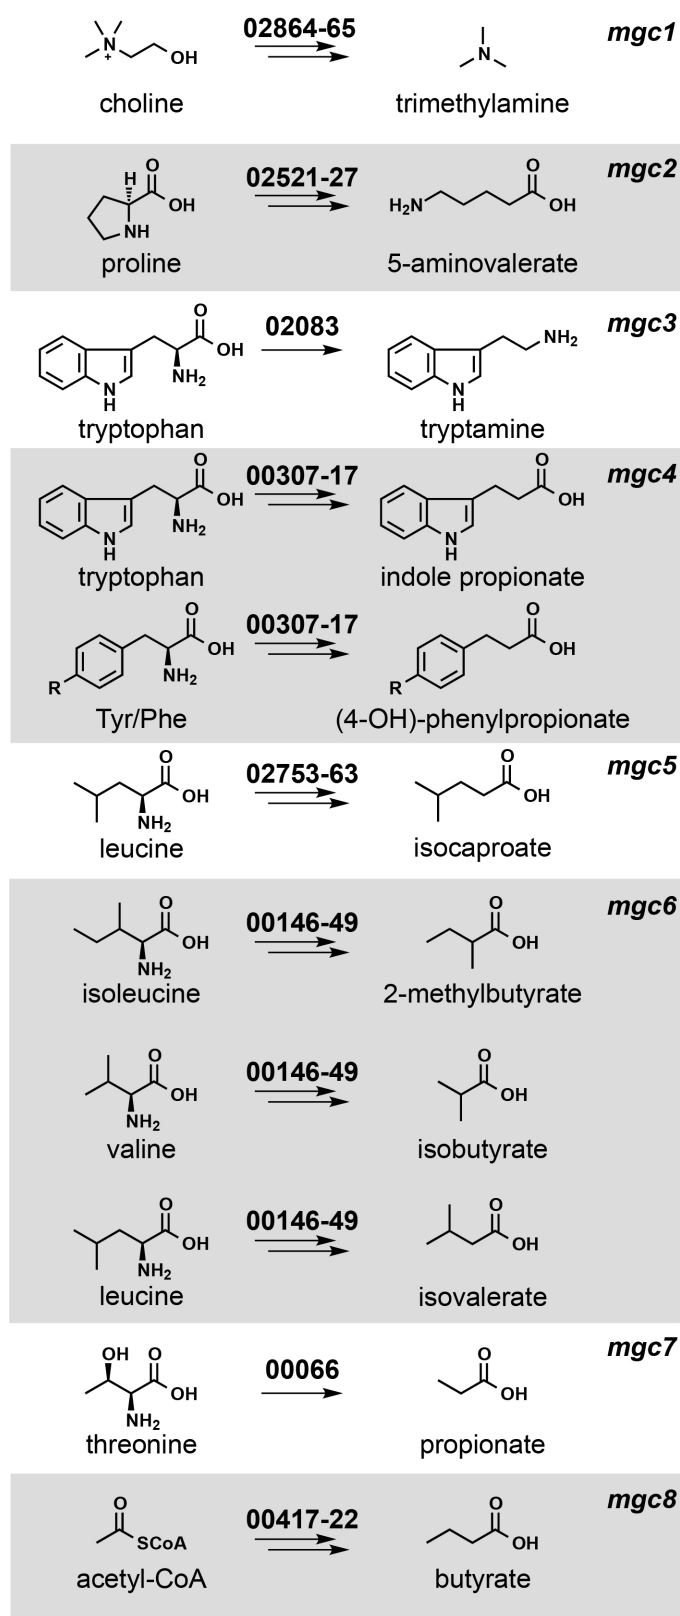

393

394 **Figure 1. Metabolic pathways from *Clostridium sporogenes* ATCC 15579 (Cs) examined in this**  
 395 **study. Each pathway generates a microbiome-derived metabolite present at high abundance in the host.**



396 The prefix “*mgc*” stands for “metabolic gene cluster”. Genes that comprise each pathway are shown above  
397 the corresponding arrows; the numbers indicate a locus tag suffix for Cs, where the prefix is “CLOSP0\_”.

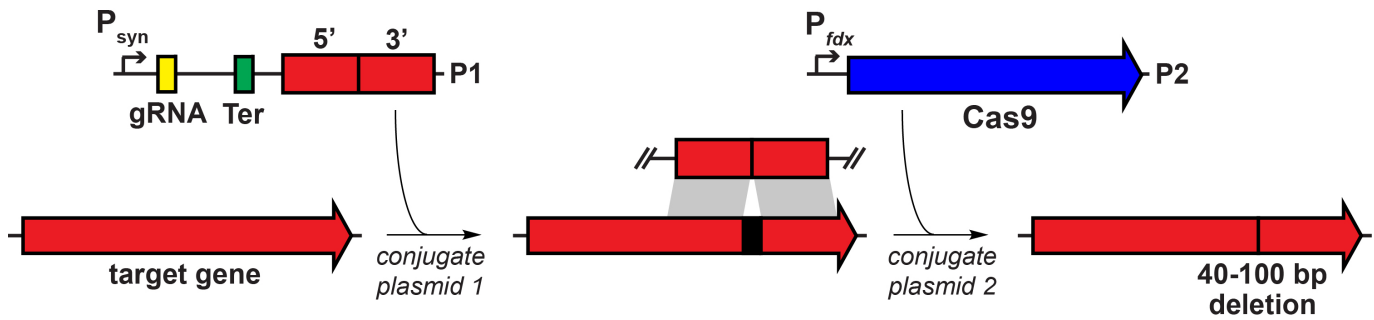

398

399

400

401

402

403

404

405

406

407

**Figure 2. Development of a CRISPR-Cas9 based genetic system for *Cs*.** Schematic view of the genetic system. In the first step, plasmid P1 is introduced by conjugation into *Cs*. P1 contains a guide RNA (gRNA) expressed under the control of  $P_{syn}$ , a synthetic promoter generated using PePPER (38); Ter, a terminator sequence from the *Cs* 16s rRNA gene; and a ~1.5-2.0 kb repair template. In the second step, plasmid P2 is introduced by conjugation. P2 consists of the Cas9 gene from *Streptococcus pyogenes* expressed under the control of  $P_{fdx}$ , the promoter from the *Cs* ferredoxin gene. Key steps in the development of the method were to introduce the genome editing components (Cas9, gRNA, and repair template) sequentially on two plasmids, and to lengthen the donor/acceptor co-cultivation step of the second conjugal transfer from 24 to 72 h.

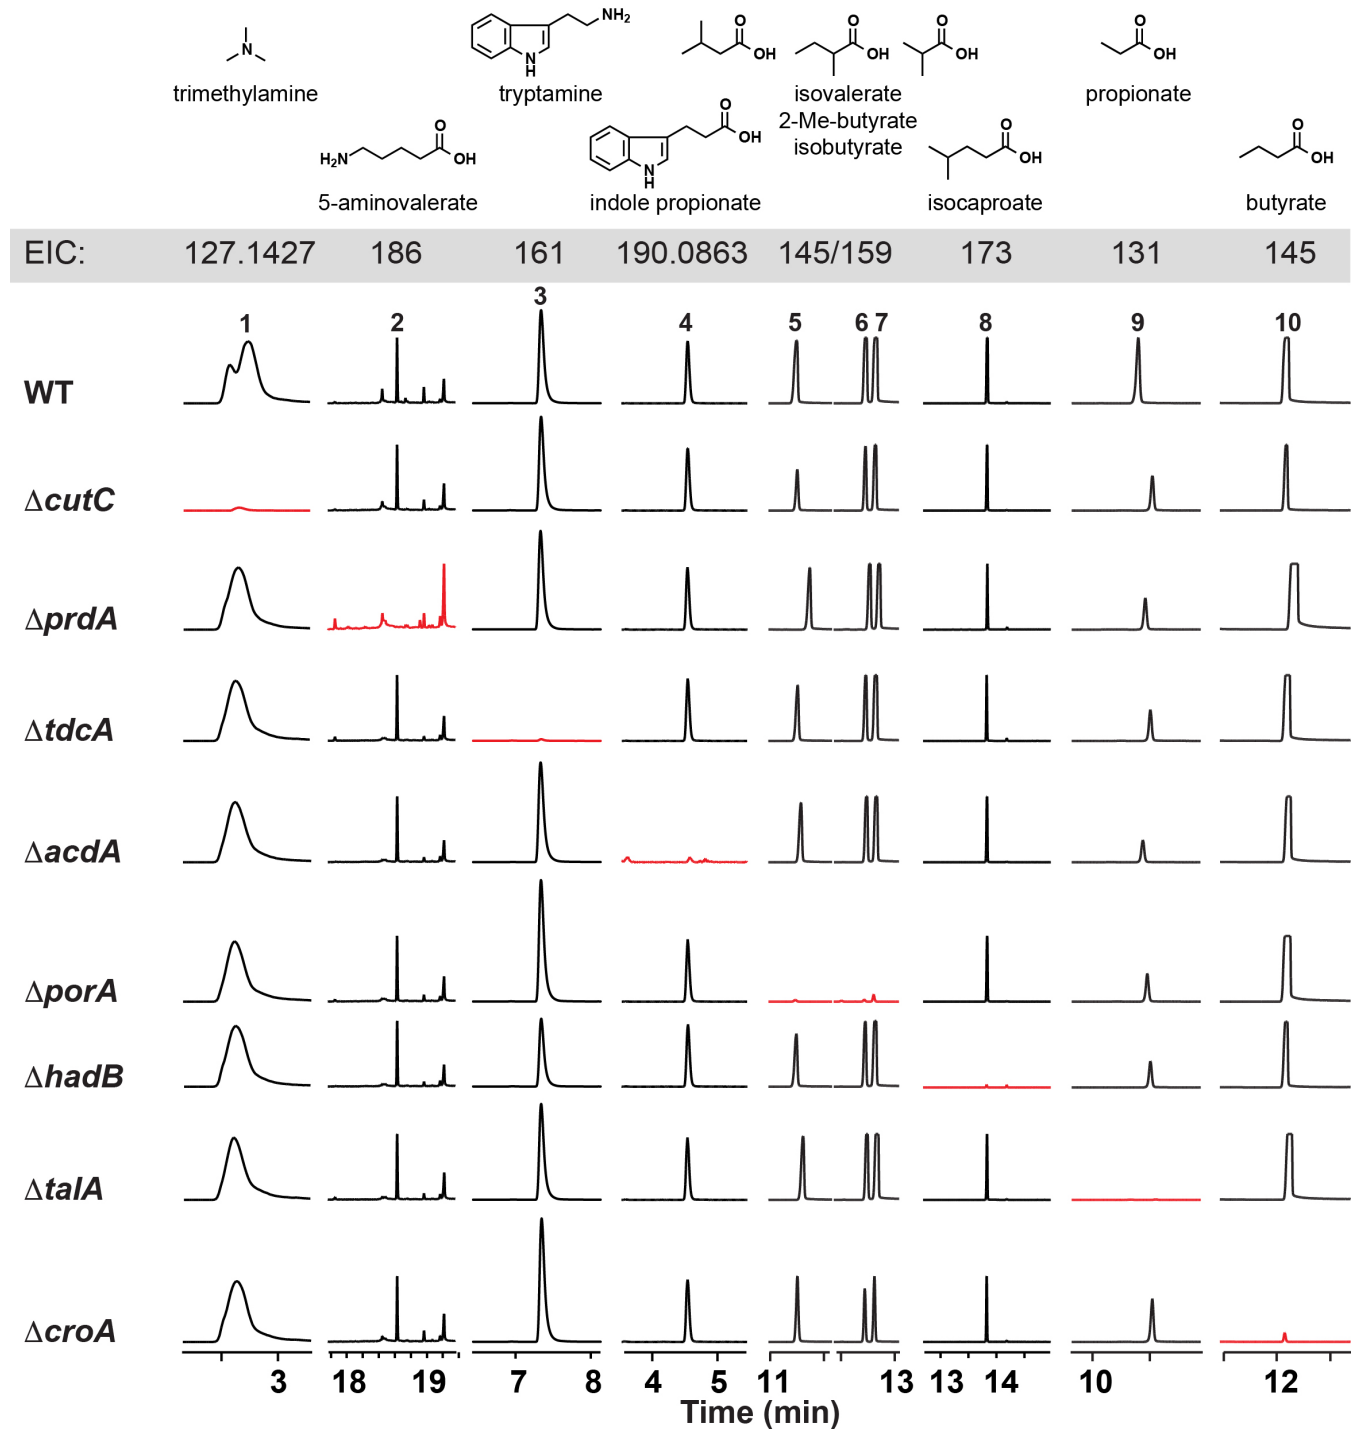

408

409 **Figure 3. Cs mutants exhibit specific loss of metabolite production *in vitro*.** Wild-type and mutant  
 410 strains of Cs were cultured individually with the pathway substrates and metabolites were assayed by LC-  
 411 MS and GC-MS. Extracted ion chromatogram windows corresponding to each of the pathway products  
 412 are shown in order to compare the metabolic output of each strain; ion counts (y-axis) are on the same  
 413 scale within a column, but have been scaled between columns. Full traces are displayed in **Figure S5**.

414 Traces in red show the metabolite whose production is blocked by the mutation indicated at the beginning  
415 of each row. Each mutant is deficient in the production of the corresponding pathway product, but proficient  
416 in the production of all other pathway products.

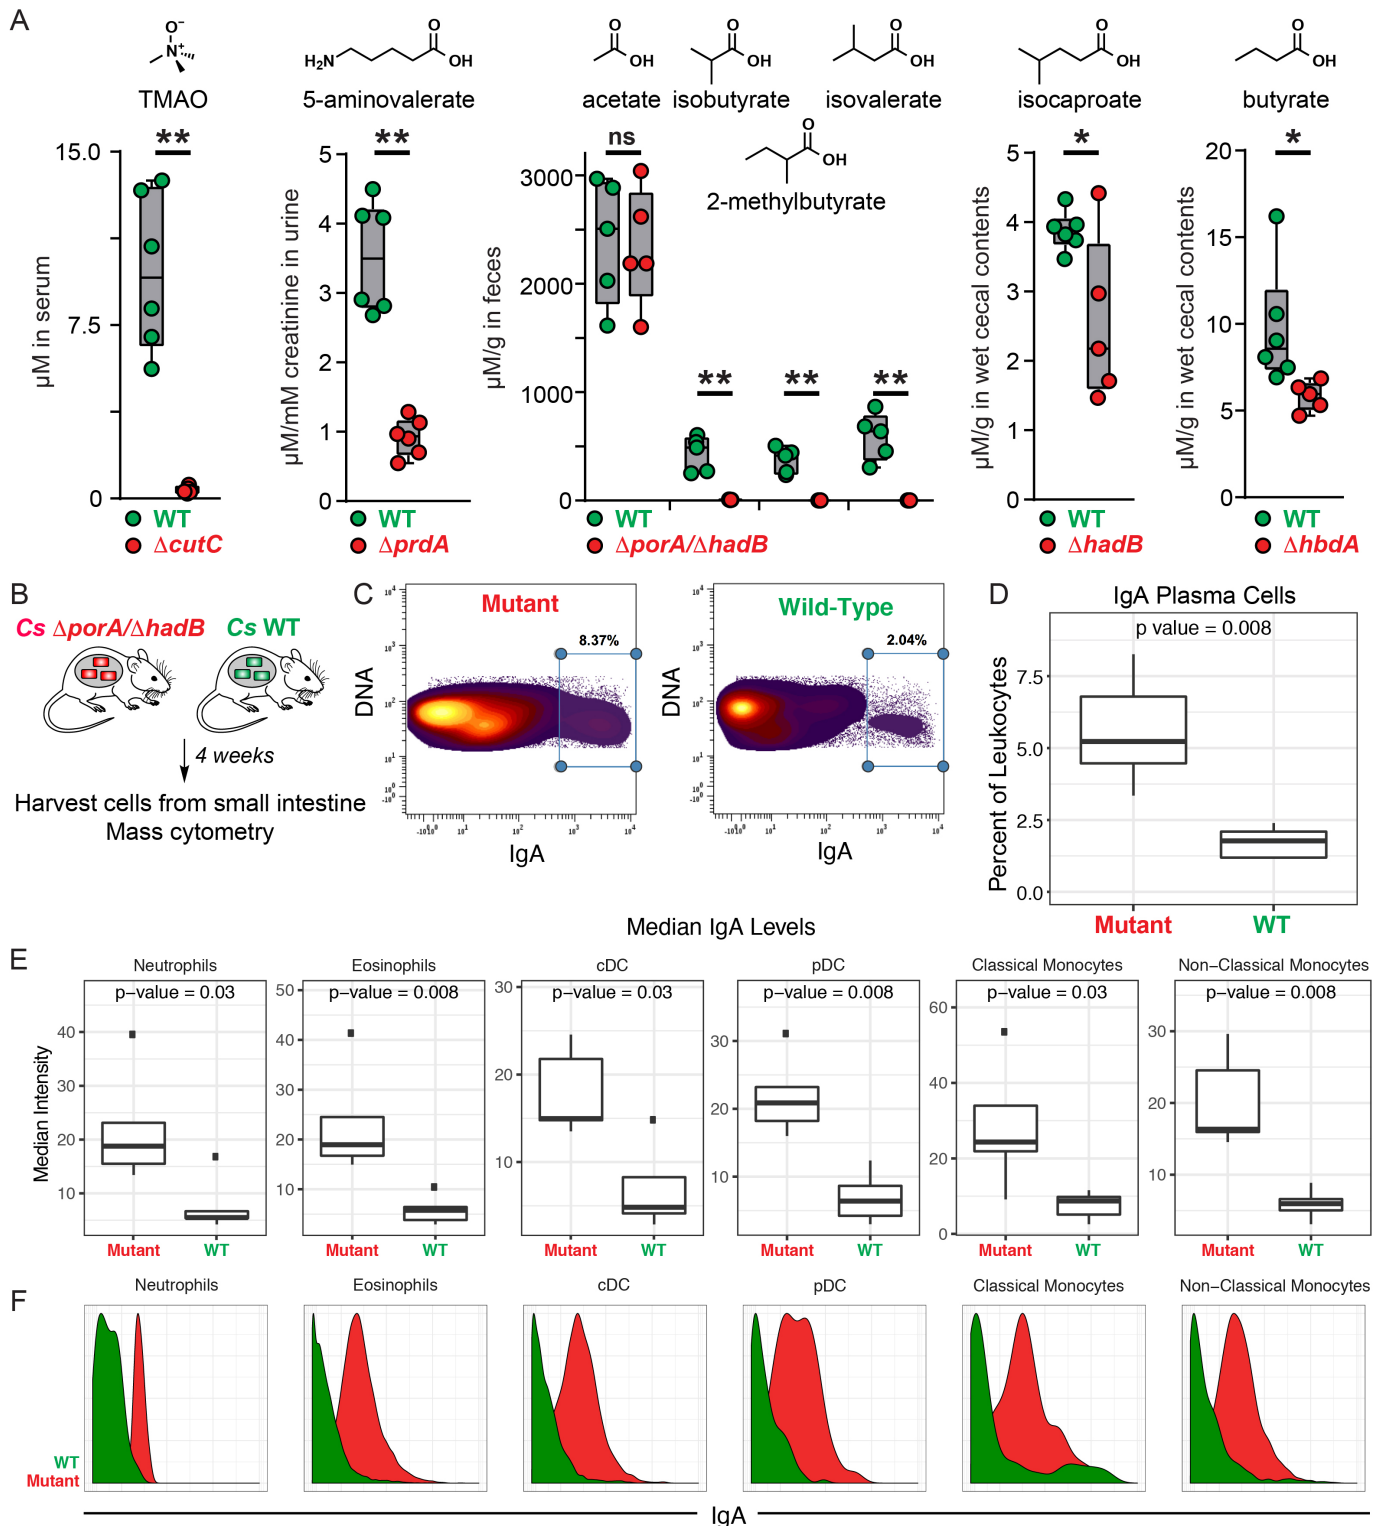

417

418 **Figure 4. Genetic depletion of metabolites in vivo by colonization with wild-type vs mutant strains**  
 419 **of *Cs*.** (A). Germ-free mice were mono-colonized with wild-type *Cs* or the  $\Delta cutC$ ,  $\Delta prdA$ ,  $\Delta porA/\Delta hadB$ ,  
 420  $\Delta hadB$ , or  $\Delta hbdA$  mutants. Metabolite levels were altered in the host by mutation of the corresponding  
 421 pathway. (B) Schematic of germ-free mouse mono-colonization experiment. (C-F) Small intestinal lamina

422 propria cells were analyzed by mass cytometry (n = 5 per group). (C) Frequency of IgA<sup>hi</sup> cells of total live  
423 immune cells. (D) IgA plasma cells were quantified as a percent of live immune cells (CD45+) after  
424 excluding cells expressing common markers of other lineages (Ly6G, Siglec-F, B220, CD3, F4/80, CD64,  
425 CD11c, CD90, CD115, NK1.1, CD49b, FcεR1α). (E-F) Levels of surface-bound IgA were quantified on the  
426 indicated immune cell populations. Statistical analysis was performed using a Wilcoxon rank-sum test for  
427 all comparisons.

1  
2  
3                   Supplementary Materials for:

4                   **Depletion of microbiome-derived molecules in the host using**  
5                   ***Clostridium* genetics**

6  
7  
8  
9                   Chun-Jun Guo<sup>1</sup>, Breanna M. Allen<sup>2</sup>, Kamir J. Hiam<sup>2</sup>, Dylan Dodd<sup>3,4</sup>, Will van Treuren<sup>4</sup>, Steven  
10                  Higginbottom<sup>4</sup>, Curt R. Fischer<sup>5</sup>, Justin L. Sonnenburg<sup>4</sup>, Matthew H. Spitzer<sup>2\*</sup>, Michael A. Fischbach<sup>1\*</sup>

11  
12  
13                  <sup>1</sup>Department of Bioengineering and ChEM-H, Stanford University and Chan Zuckerberg Biohub,  
14                  Stanford, CA 94305, USA

15                  <sup>2</sup>Graduate Program in Biomedical Sciences, Departments of Otolaryngology and Microbiology &  
16                  Immunology, Helen Diller Family Comprehensive Cancer Center, Parker Institute for Cancer  
17                  Immunotherapy, University of California, San Francisco, San Francisco, CA 94143, USA

18                  <sup>3</sup>Department of Pathology, Stanford University School of Medicine, Stanford, California 94305, USA

19                  <sup>4</sup>Department of Microbiology and Immunology, Stanford University School of Medicine and Chan  
20                  Zuckerberg Biohub, Stanford, California 94305, USA

21                  <sup>5</sup>ChEM-H, Stanford University and Chan Zuckerberg Biohub, Stanford, CA 94305, USA

22  
23  
24  
25  
26  
27  
28  
29                  \*Correspondence: [fischbach@fischbachgroup.org](mailto:fischbach@fischbachgroup.org), [matthew.spitzer@ucsf.edu](mailto:matthew.spitzer@ucsf.edu)

## 30 MATERIALS AND METHODS

### 31 Assessing the metagenomic abundance of each pathway

32 We used MetaQuery (1) to assess the metagenomic abundance of each pathway. We started by  
33 identifying a key gene in each pathway – one that is predicted to encode an enzyme that catalyzes  
34 essential or committed step: *cutC* (trimethylamine), *prdA* (5-aminovalerate), *tdcA* (tryptamine), *fldB*  
35 (indolepropionate), *porA* (isovalerate, 2-methylbutyrate, isobutyrate), *hadB* (isocaproate), *talA*  
36 (propionate), and *thIA* (butyrate). We used the following parameters in Metaquery: pairwise identity >50%,  
37 maximum e-value: 1e-5, query and target alignment coverage >70%, across 2000 publicly available human  
38 metagenomic stool samples. The results are shown in **Figure S2**.

39

### 40 Assessing the metatranscriptomic abundance of each pathway

41 We built a local DNA sequence database that consists of 479 bacterial reference genomes obtained  
42 from the NIH Human Microbiome Project (HMP) website (<https://hmpdacc.org/>). We used the amino acid  
43 sequences of CutC, PrdA, TdcA, FldB, PorA, HadB, TalA, and ThIA as queries in a tblastn search of this  
44 database to identify homologs of each enzyme (maximum E-value: 1e-5). After removing hits with  
45 coverage <50% or pairwise identity <40%, we used the remaining sequences to construct a local database  
46 for metatranscriptomic analysis. We mapped metatranscriptomic reads from the stool of nine healthy  
47 human subjects (2) to this database using Bowtie 2 (local, medium sensitivity); representative mapping  
48 results are shown in **Figure S2**. We then set out to compare the expression of our target genes with its  
49 surrounding neighbors in the genome. For any gene to which reads mapped, we extracted a genomic  
50 region of ~100 kb (~50 kb 5' of the gene and ~50kb 3') to construct a second database. The same  
51 metatranscriptomic dataset was mapped to this database using Bowtie 2 (local, medium sensitivity);  
52 representative results for two clusters, *prd* and *por*, are shown in **Figure S2**.

53

### 54 Constructing *Cs* mutants using CRISPR/Cas9

#### 55 *Vector assembly*

56 Primers and strains used in this study are listed in **Tables S1** and **S2**, respectively. The coding  
57 sequence of Cas9 was cloned from the vector pMJ825 (Addgene) using primers  
58 83153\_Cas9\_(A10D)\_XbaI\_F and 83153\_Cas9\_XhoI\_R. The purified PCR product and pMTL83153 were  
59 digested with XbaI/XhoI and ligated together using Instant Sticky-end Ligase (NEB), yielding  
60 pMTL83153\_fdx\_Cas9 (plasmid 1, P1) (**Figures 2** and **S3**).

61 We assembled DNA sequences encoding the gRNA locus (the gRNA plus adjacent elements) and  
62 the repair template into pMTL82254 as a backbone (specific details below). The repair template consists  
63 of two 700-1200 bp sequences flanking the 40-100 bp sequence targeted for excision. The design of the  
64 gRNA locus is shown below:



65 **GTGCTACCAACACATCAAGC****GGCGCC****TTGACATGGGCTCACGAGAGCCTCTACTATAATATTG**  
66 **TAGCTTGCCGTATACACAA**GTTTTAGAGCTAGAAATAGCAAGTTAAAATAAGGCTAGTCCGTTAT  
67 **CAACTTGAAAAAGTGGCACCGAGTCGGTGCTTTTTT**AGGAGAATAGAAAGAAGAAAATTCTTTCT  
68 **AAAGGCTGAATTCTCTGTTTAATTTT**GAGAGACCATTCTCTCAAATTGAACTTCTCAATAAAAA  
69 **TTGAGAAGTAGCTGACCATCACAAAATCGTAGATTTGGATGTCTAGCTATGTTCTTTGAAAATTG**  
70 **CACAGTGAATAAGTAAAGCTAAAGGTATATAAAAATCCTTTGTAAGAATACAATTT****GGCGCC**  
71 **GCAAAGTGACAGAGGAAAGC**

72 The sequences highlighted in green are homologous to regions in pMTL82254. The sequence in blue is a  
73 synthetic promoter predicted by PePPER using the *Clostridium sporogenes* ATCC 15579 (Cs) genome as  
74 the calculation input (3). The red sequence is a small guide RNA (sgRNA) targeting the Cs chromosome.  
75 The sequence in yellow is for Cas9 binding, and the pink sequence is a terminator region obtained from  
76 the Cs 16s rRNA gene (CLOSPO\_00916). The underlined sequences are NotI restriction sites that were  
77 not used in this study.

78 Using the *cutC* gene as an example, we used two primer pairs, 02864\_TMA\_F1+R2 and  
79 02864\_TMA\_F3+R4 (**Table S1**), to synthesize the repair template, which consists of two regions (700-  
80 1200 bp each) flanking the sequence that is targeted for excision. The gRNA locus was synthesized  
81 commercially (gBlocks, IDT). The synthetic gRNA locus was fused to the repair template using fusion PCR  
82 with the primer set gRNA\_F\_NotI + gRNA\_R\_AscI. The purified PCR product (consisting of gRNA locus +  
83 repair template) was then cloned into a pMTL82254 backbone (4) that had been doubly digested by  
84 NotI/AscI using Instant Sticky-end Ligase (NEB), yielding pMTL82254\_TMA\_gRNA+rep temp (plasmid 2,  
85 P2) (**Figures 2** and **S3**). P1 and P2 (**Figure S3**) were introduced into two separate strains of *E. coli* S17  
86 by electroporation.

87

#### 88 *Introducing vectors by conjugation into Cs*

89 The process of constructing a single Cs mutant consists of two sequential conjugations from *E. coli*  
90 into Cs. For the first conjugation, a single colony of wild-type Cs was used to inoculate a 2 ml TYG broth  
91 culture in an anaerobic chamber at 37 °C under an atmosphere consisting of 10% CO<sub>2</sub>, 5% H<sub>2</sub>, 85% N<sub>2</sub>.  
92 *E. coli* S17 harboring P2 was grown in LB broth supplemented with erythromycin (250 µg/mL) at 30 °C  
93 with shaking at 225 rpm. After 17-24 hours, 1 mL *E. coli* S17 culture was centrifuged at 1000 x g for 1 min.  
94 The supernatant was discarded and the cell pellet was washed twice with 500 µL PBS buffer (pH = 7.2).  
95 The washed *E. coli* cell pellet was transferred into the anaerobic chamber, and 250 µL of Cs overnight  
96 culture was added and thoroughly mixed with *E. coli* cell pellet by pipetting. A 30 µL aliquot of the cell  
97 mixture was plated on a pre-reduced TYG agar plate as a liquid dot (a total of eight dots) for 24 h. Cell  
98 material in these dots was removed from the plate using a sterile inoculation loop and suspended in 250  
99 µL pre-reduced PBS buffer (pH = 7.2). 100 µL of the cell suspension was plated on TYG agar + 10 µg/mL

100 erythromycin + 250 µg/mL D-cycloserine. Cs colonies typically appeared after 36-48 h. Three colonies  
101 were picked and re-streaked on TYG agar + 10 µg/mL erythromycin + 250 µg/mL D-cycloserine to isolate  
102 single colonies. The transformation efficiency was typically high for this step, so one single colony was  
103 picked as the starting point for the second conjugation.

104 In the second conjugation, *E. coli* S17 harboring P1 was grown in LB broth supplemented with  
105 chloramphenicol (25 µg/mL) at 30 °C with shaking at 225 rpm. After washing the *E. coli* cell pellet as  
106 described in the previous paragraph, the washed *E. coli* cell pellet was transferred into anaerobic chamber  
107 and 250 µL of an overnight culture Cs (harboring vector P2) was added and thoroughly mixed with the *E.*  
108 *coli* cell pellet by pipetting. A 30 µL aliquot of the cell mixture was plated on a pre-reduced TYG agar plate  
109 as a liquid dot (a total of eight dots) for 72 h. Cell material in these dots was removed from the plate using  
110 a sterile inoculation loop and suspended in 250 µL pre-reduced PBS buffer (pH = 7.2). 100 µL of the cell  
111 suspension was plated on each of two TYG plates with 10 µg/mL erythromycin + 15 µg/mL thiamphenicol  
112 + 250 µg/mL D-cycloserine. Cs colonies typically appeared after 36-48 h. Sixteen colonies were picked  
113 and re-streaked on TYG agar + 10 µg/mL erythromycin + 15 µg/mL thiamphenicol + 250 µg/mL D-  
114 cycloserine to isolate single colonies. The isolated single colony was used to inoculate TYG broth  
115 supplemented with 10 µg/mL erythromycin + 15µg/mL thiamphenicol, and genomic DNA was isolated from  
116 the resulting cell material using Quick DNA fungal/bacterial kit (Zymo Research). We used diagnostic PCR  
117 and sequencing to identify mutants whose genomes harbor the desired deletions (see **Figure S4** for more  
118 details). For generating double-deletion mutants like  $\Delta porA/\Delta hadB$ , the first deletion was introduced using  
119 the CRISPR/Cas9 system. Following sequence verification, the mutant was plated on non-selective agar  
120 for multiple rounds to cure both plasmids, and then the process was repeated to introduce a second  
121 deletion.

122

### 123 **LC-MS/GC-MS analysis of Cs metabolites**

124 A single colony of wild-type Cs or one of the mutant strains described herein was used to inoculate  
125 a 1 mL pre-reduced TYG broth culture [500 mL: 15 g tryptone, 10 g yeast extract, 0.5 g sodium  
126 thioglycolate, antibiotic concentration (if needed): thiamphenicol, 15 µg/ml; erythromycin, 10 µg/ml]. To  
127 pre-reduce, the TYG medium was left in the chamber with a loosened cap for at least 48 h before  
128 inoculation. The culture was incubated in an anaerobic chamber at 37 °C under an atmosphere consisting  
129 of 10% CO<sub>2</sub>, 5% H<sub>2</sub>, 85% N<sub>2</sub>.

130 1) *Quantification of the conversion of d<sub>9</sub>-choline to d<sub>9</sub>-trimethylamine (d<sub>9</sub>-TMA) by wild-type and*  
131 *mutant strains of Cs. For in vitro bacterial cultures:* TYG broth was supplemented with 60 mM d<sub>9</sub>-choline.  
132 Following inoculation, the bacterial culture was incubated in the anaerobic chamber for 24 h. The overnight  
133 bacterial culture was centrifuged at 13000 x g for 10 min at room temperature. 100 µL of the cell-free  
134 supernatant was mixed with 10 µL of concentrated ammonia (7M in methanol) and 30 µL of ethyl

135 bromoacetate (20 mg/mL in acetonitrile). The mixture was incubated at room temperature for ~30 min and  
136 then quenched with equal volume of infusion solution (acetonitrile/water/formic acid, 50/50/0.025 (v/v/v))  
137 (5).

138 1  $\mu$ L of the quenched mixture was analyzed by LC-MS (Agilent 6530 QTOF) using the following  
139 conditions: The LC analysis was performed in positive mode using a Bio-Bond (Dikma Technologies) C4  
140 column (5  $\mu$ m, 4.6 mm  $\times$  50 mm), preceded by a C4 precolumn (3.5  $\mu$ m, 2.0 mm  $\times$  20 mm). The mobile  
141 phase was 50/50 water/methanol (v/v) supplemented with 5 mM ammonium formate and 0.1% formic acid.  
142 The flow rate was 0.3 mL/min and run time was 6 min for each sample. The first 1.8 min of each analysis  
143 run was diverted to waste.

144 For mouse samples: To quantify the level of TMAO in serum samples, 20  $\mu$ L serum was mixed with  
145 80  $\mu$ L of 10  $\mu$ M d<sub>9</sub>-TMAO in MeOH, and 5  $\mu$ L was analyzed using an Agilent 6470 LC-QQQ. The  
146 concentration of TMAO in the serum was determined by comparing its AUC (area under the curve) with  
147 that of d<sub>9</sub>-TMAO. We used the following chromatography conditions for the LC-QQQ: We used an Acquity  
148 UPLC BEH HILIC column (130 Å, 1.7  $\mu$ m, 2.1 mm $\times$ 100 mm, Waters Corp., Milford, MA, USA) with an  
149 Acquity UPLC BEH HILIC VanGuard pre-column (130 Å, 1.7  $\mu$ m, 2.1 mm $\times$ 5 mm). We used the following  
150 solvent system: A: H<sub>2</sub>O with 0.1% formic acid; B: Acetonitrile with 0.1% formic acid. 5  $\mu$ L of each sample  
151 was injected, and the flow rate was 0.6 ml/min with a column temperature of 50 °C. The gradient for HPLC-  
152 MS analysis was: 0-0.8 min 5% A - 96% A, 0.8-1.9 min 96% A - 5% A. MRM was performed by filtering  
153 the precursor ions for m/z values of 76.1 to 58.1 (TMAO) and 85.1 to 68.1 (d<sub>9</sub>-TMAO), and the collision  
154 energies were 21 and 13 V, respectively (6). The y-axis of the graph depicting TMAO levels (at right in  
155 **Figure 4A**) was scaled to account for a previously identified difference in the intensity ratios of the two  
156 product ions between TMAO and d<sub>9</sub>-TMAO (7).

157 *2) Quantification of 5-aminovalerate production by wild-type and mutant strains of Cs.* The sample  
158 preparation, derivatization, and chromatography conditions were adapted from a previously reported  
159 method (8). The bacterial culture was incubated in the anaerobic chamber for 48 hrs. Following incubation,  
160 a 100  $\mu$ L aliquot of the culture was mixed with 80  $\mu$ L of a propanol/pyridine solution (3:2, v/v), to which 10  
161  $\mu$ L propyl-chloroformate (PCF) was added. For urine samples, 20  $\mu$ L of a urine sample was diluted 10-fold  
162 with ddH<sub>2</sub>O and mixed with 16  $\mu$ L of a propanol/pyridine solution (3:2, v/v); 2  $\mu$ L PCF was then added. The  
163 resulting derivatization reaction mixtures were sonicated at room temperature for 3 min and then extracted  
164 with an equal volume of hexanes. 1  $\mu$ L of the organic layer was analyzed using a 7890B GC System  
165 (Agilent Technologies) and 5973 Network Mass Selective Detector (Agilent Technologies). We used the  
166 following chromatography conditions for GC-MS: Column: HP-5MS, 30 m, 0.25 mm, 0.25  $\mu$ m; Injection  
167 volume: 1  $\mu$ L; Injection Mode: splitless; Temperature Program: 40 °C for 0.1 min; 40-70 °C at 5 °C/min,  
168 hold at 70 °C for 3.5 min; 70-160 °C at 20 °C/min; 160 to 325 °C at 35 °C/min; equilibrate for 3 min.

169 4) *Detection of indole propionate production by wild-type and mutant strains of Cs.* Following 24  
170 hr incubation, the bacterial culture (1 ml total volume) was adjusted to pH ~2 using 6M HCl and extracted  
171 2x with an equal volume of ethyl acetate (EA). Solvent was removed from the combined EA fractions using  
172 a TurboVap. Indole propionate was validated by HRESIMS analysis [M - H]<sup>-</sup> m/z found 188.0702, calcd for  
173 C<sub>11</sub>H<sub>10</sub>NO<sub>2</sub> 188.0712]. The dried residue was resuspended in 100 µL 80%/20% DMSO/MeOH, and 5 µL  
174 of this solution was analyzed by LC-MS (Agilent 6530 QTOF) using the following conditions: Column:  
175 Agilent SB C-18, 1.8 µm, 3.0 x 100 mm; Solvent system: A: H<sub>2</sub>O with 0.1% formic acid; B: Acetonitrile with  
176 0.1% formic acid. The gradient for LC-MS analysis was 0-5 min 100% A, 5-35 min 100% A - 0% A, 35-37  
177 min 0% A, 37-39 min 0% A - 100% A, 39-41 min 100% A at a flow rate of 0.4 ml/min.

178 5) *Detection of isovalerate, 2-methylbutyrate, isobutyrate, isocaproate, propionate, and butyrate*  
179 *production by wild-type and mutant strains of Cs.* Cultures were incubated for 48 h in the anaerobic  
180 chamber. Following incubation, a 50 µL aliquot of the culture was removed and acidified by the addition of  
181 50 µL 6M HCl and 150 µL ddH<sub>2</sub>O. The resulting mixture was extracted with an equal volume of diethyl  
182 ether. For derivatization, 95 µL of diethyl ether extract was mixed with 5 µL N-tert-butyldimethylsilyl-N-  
183 methyltrifluoroacetamide (MTBSTFA) and incubated at room temperature for 48 h. Following  
184 derivatization, 1 µL of the organic layer was analyzed by GC-MS. Peaks were assigned by comparison  
185 with authentic standards and a standard curve was prepared for each chemical to quantify its concentration  
186 in biological samples. For measuring propionate in wild-type Cs and the  $\Delta$ talA mutant: Both strains were  
187 grown in 5 mL TYG broth under anaerobic conditions for 48 h. Cultures were centrifuged at 5000 x g for 5  
188 min, and the supernatant was discarded. The bacterial pellet was washed with pre-reduced PBS buffer  
189 (pH = 7.4, Gibco) twice, and then suspended in 1 mL PBS buffer. 100 µL L-threonine was added to the  
190 900 µL cell suspension to reach a final concentration of 500 µM and incubated for 1 h, and a 50 µL aliquot  
191 was removed and acidified by the addition of 50 µL 6M HCl and 150 µL ddH<sub>2</sub>O. The resulting mixture was  
192 extracted with an equal volume of diethyl ether. For derivatization, 95 µL of diethyl ether extract was mixed  
193 with 5 µL MTBSTFA and incubated at room temperature for 48 h. Following derivatization, 1 µL of the  
194 organic layer was analyzed by GC-MS. For samples from mice: In brief, 500 µL of an extraction solution  
195 (10 µL 10 mM n-valeric acid in water as internal standard, 50 µL 6M HCl, 190 µL ddH<sub>2</sub>O, 250 µL diethyl  
196 ether) and six 6 mm ceramic beads were added to ~100 mg wet cecal contents or fecal pellets. Samples  
197 were homogenized by vigorous shaking using a QIAGEN Tissue Lyser II at 25/s for 10 min. The resulting  
198 homogenates were subjected to centrifugation at 18000 x g for 10 min.

199 The organic layer was transferred to a new glass vial for derivatization using the following  
200 procedure: 95 µL of diethyl ether extract was mixed with 5 µL MTBSTFA and incubated at room temperature  
201 for 48 h. 1 µL of the derivatized samples were analyzed using a 7890B GC System (Agilent Technologies)  
202 and 5973 Network Mass Selective Detector (Agilent Technologies). We used the following chromatography  
203 conditions for GC-MS: Column: HP-5MS, 30 m, 0.25 mm, 0.25 µm; Injection Mode: splitless; Temperature

204 Program: 50 °C for 2 min; 50-70 °C at 10 °C/min; 70-85 °C at 3 °C/min; 85 to 110 °C at 5 °C/min; 110 to  
205 290 °C at 30 °C/min, equilibration for 3 min. 1 µL of each sample was injected and analyte concentrations  
206 were quantified by comparing their peak areas with those of authentic standards.

207 6) *Quantification of creatinine in urine samples.* 6 µL of a urine sample was mixed with 114 µL  
208 ddH<sub>2</sub>O. The creatinine concentration of each diluted sample was measured using a Creatinine Assay Kit  
209 (ab204537).

210

### 211 **Colonizing germ-free mice with *Cs* strains**

212 All experiments were performed using germ-free Swiss Webster mice (male, 6–10 weeks of age,  
213 n = 5 or 6 per group) originally obtained from Taconic Biosciences (Hudson, NY) and colonies were  
214 maintained in gnotobiotic isolators in accordance with A-PLAC, the Stanford IACUC. Germ-free mice were  
215 mono-colonized with wild-type or mutant strains of *Cs* by oral gavage of an overnight culture of WT or  
216 mutant *Cs* in TYG medium (200 µL;  $\sim 1 \times 10^7$  CFU).

217 For quantifying *Cs*-derived small molecules in vivo, mice (n = 5 or 6 per group) were maintained on  
218 standard chow (LabDiet 5K67). Urine and fecal samples were collected weekly and analyzed by GC-MS  
219 or LC-MS. After four weeks of colonization, mice were euthanized humanely by CO<sub>2</sub> asphyxiation. Blood  
220 was collected by cardiac puncture and serum was prepared using microtainer serum separator tubes  
221 obtained from Becton Dickinson (Cat. # 365967). The urine, cecal contents, and feces were collected and  
222 snap-frozen in liquid nitrogen and stored at -80 °C until use.

223 For mass-cytometry analysis, two groups of germ-free mice (n = 5 per group) were mono-colonized  
224 by wild-type *Cs* or the  $\Delta porA/\Delta hadB$  double mutant by oral gavage. The mice were maintained on a high-  
225 protein chow (Teklad TD.90018; 40% protein) for four weeks. Fecal and urine samples were collected two  
226 weeks after colonization and analyte levels were measured using the procedures described above.

227

### 228 **Preparation of single-cell suspensions from the small intestine**

229 Small intestines were harvested from animals and placed in RPMI medium on ice. Intestines were  
230 filleted open and washed 2x in PBS. Tissues were cut into 0.5 cm pieces and washed for 15 min in 5 ml  
231 HBSS + 0.015% DTT at 37 °C with steady rotation. Tissues were then washed for 30 min in 5 ml HBSS +  
232 5% FCS + 25mM HEPES at 37 °C with steady rotation. Tissue pieces were rinsed in PBS thoroughly  
233 followed by complete RPMI medium and minced to  $\sim 1 \text{ mm}^3$  pieces with surgical scissors. Tissue pieces  
234 were digested in complete RPMI + 0.167 mg/ml Liberase (Roche) + 0.25 mg/ml DNase I (Sigma-Aldrich)  
235 for 30 min at 37 °C. Digestion was quenched with complete RPMI, and cells were washed with PBS + 5  
236 mM EDTA before labeling with 25 µM cisplatin viability dye for mass cytometry analysis. Viability stain was  
237 quenched with PBS + 0.5% BSA + 25 mM EDTA. Cells were washed twice in PBS + 0.5% BSA + 0.02%  
238 NaN<sub>3</sub> before fixation with 1.5% paraformaldehyde (Electron Microscopy Sciences) for 10 min at room



239 temperature. Cells were washed twice in PBS + 0.5% BSA + 0.02% NaN<sub>3</sub> and stored at -80 °C for  
240 subsequent mass cytometry analysis.

241

## 242 **Mass cytometry analysis**

243 *Antibody preparation:* A summary of all mass cytometry antibodies, reporter isotopes and  
244 concentrations used for analysis can be found in **Table S3**. Primary conjugates of mass cytometry  
245 antibodies were prepared using the MaxPAR antibody conjugation kit (Fluidigm) according to the  
246 manufacturer's recommended protocol. Following labeling, antibodies were diluted in Candor PBS  
247 Antibody Stabilization solution (Candor Bioscience GmbH, Wangen, Germany) supplemented with 0.02%  
248 NaN<sub>3</sub> to between 0.1 and 0.3 mg/mL and stored long-term at 4 °C. Each antibody clone and lot was titrated  
249 to optimal staining concentrations using primary murine samples. One antibody cocktail was prepared for  
250 the staining of all samples for mass cytometry analysis.

251 *Mass-Tag Cellular Barcoding:* Mass-tag cellular barcoding was pre-formed as previously described  
252 (9). Briefly, 1\*10<sup>6</sup> cells from each animal were barcoded with distinct combinations of stable Pd isotopes  
253 in 0.02% saponin in PBS. All samples were barcoded together. Cells were washed two times in PBS with  
254 0.5% BSA and 0.02% NaN<sub>3</sub> and pooled into a single tube. After data collection, each condition was  
255 deconvoluted using a single-cell debarcoding algorithm (9).

256 *Mass Cytometry Staining and Measurement:* Cells were resuspended in PBS with 0.5% BSA and  
257 0.02% NaN<sub>3</sub> and unlabeled antibodies against CD16/32 were added at 20 µg/ml for 5 min at RT on a  
258 shaker to block Fc receptors. Surface marker antibodies were then added, yielding a 500 µL final reaction  
259 volume and stained at room temperature for 30 min at RT on a shaker. Following staining, cells were  
260 washed once with PBS with 0.5% BSA and 0.02% NaN<sub>3</sub> then once with 1X Foxp3/Transcription factor  
261 permeabilization buffer (eBioscience). Cells were then stained with intracellular antibodies in a final volume  
262 of 500 µL permeabilization buffer for 30 min at RT on a shaker. Cells were washed twice in PBS with 0.5%  
263 BSA and 0.02% NaN<sub>3</sub> and then stained with 1 mL of 1:4000 <sup>191/193</sup>Ir DNA intercalator (Fluidigm) diluted in  
264 PBS with 1.6% PFA overnight. Cells were then washed once with PBS with 0.5% BSA and 0.02% NaN<sub>3</sub>  
265 and then two times with double-deionized (dd)H<sub>2</sub>O. Care was taken to assure buffers preceding analysis  
266 were not contaminated with metals in the mass range above 100 Da. Mass cytometry samples were diluted  
267 in ddH<sub>2</sub>O containing bead standards (see below) to approximately 10<sup>6</sup> cells per mL and then analyzed on  
268 a CyTOF™ 2 mass cytometer (Fluidigm) equilibrated with ddH<sub>2</sub>O. We analyzed 2-6\*10<sup>5</sup> cells per animal,  
269 consistent with generally accepted practices in the field.

270 *Bead Standard Data Normalization:* Just before analysis, the stained and intercalated cell pellet  
271 was resuspended in ddH<sub>2</sub>O containing the bead standard at a concentration ranging between 1 and 2\*10<sup>4</sup>  
272 beads per ml as previously described (10). The bead standards were prepared immediately before  
273 analysis, and the mixture of beads and cells were filtered through a filter cap FACS tubes (BD Biosciences)

274 before analysis. All mass cytometry files were normalized together using the mass cytometry data  
275 normalization algorithm (10), which uses the intensity values of a sliding window of these bead standards  
276 to correct for instrument fluctuations over time and between samples.

277

## 278 **SUPPLEMENTARY TEXT**

### 279 **Developing a CRISPR/Cas9-based genetic system for *Cs*: Optimization and experimental design**

280 We started by testing the CRISPR-Cas9 nickase system in *Cs*, as a similar system had been  
281 developed for *C. cellulolyticum*, a candidate for organic solvent production in industry (11). We assembled  
282 the Cas9 nickase, the small guide RNA (sgRNA), and a ~2 kb repair template that flanks the targeted  
283 region in the *Cs* chromosome with pMTL83153 (4). We sequenced the *Cs* transconjugant and found no  
284 evidence of genome editing, leading us to try a genetic system with a fully functional Cas9 enzyme.

285 However, after replacing the Cas9 nickase with wild-type Cas9 in the assembled vector, we were  
286 unable to obtain any viable colonies that harbor the modified vector even after multiple trials. Since  
287 previous literature suggests that delayed or inducible Cas9 expression (12, 13) can improve genome  
288 editing efficiency, we put Cas9 under the control of either a *spoIIIE* promoter or a lactose-inducible  
289 promoter. We still did not obtain any viable colonies with the resulting vectors.

290 In the meantime, we observed that we were unable to get viable colonies of *Cs* when the size of  
291 the conjugal vector exceeds ~10 kb. To address this problem, we divided the components of the CRISPR-  
292 Cas9 system (Cas9 enzyme, gRNA, and repair template) between two separate vectors (**Figure S3**).  
293 However, we still failed to get viable colonies. By extending the incubation time of *Cs* with the *E. coli*  
294 conjugation donor to 72 h during conjugation, we were able to get one viable colony. Based on this  
295 observation, we developed an efficient protocol for mutating genes in *Cs* using CRISPR-Cas9 (See  
296 Materials and Methods for details).

297 **SUPPLEMENTARY FIGURES**

298

299

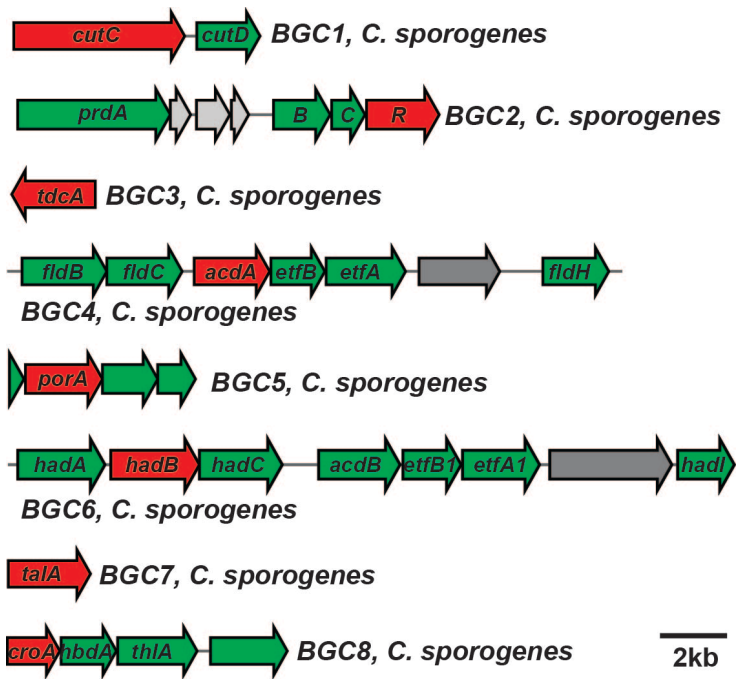

300

301

302 **Figure S1.** Gene clusters characterized in this study. A 40-100 bp fragment was deleted from each of the  
303 genes shown in red using the CRISPR/Cas9-based system.

304



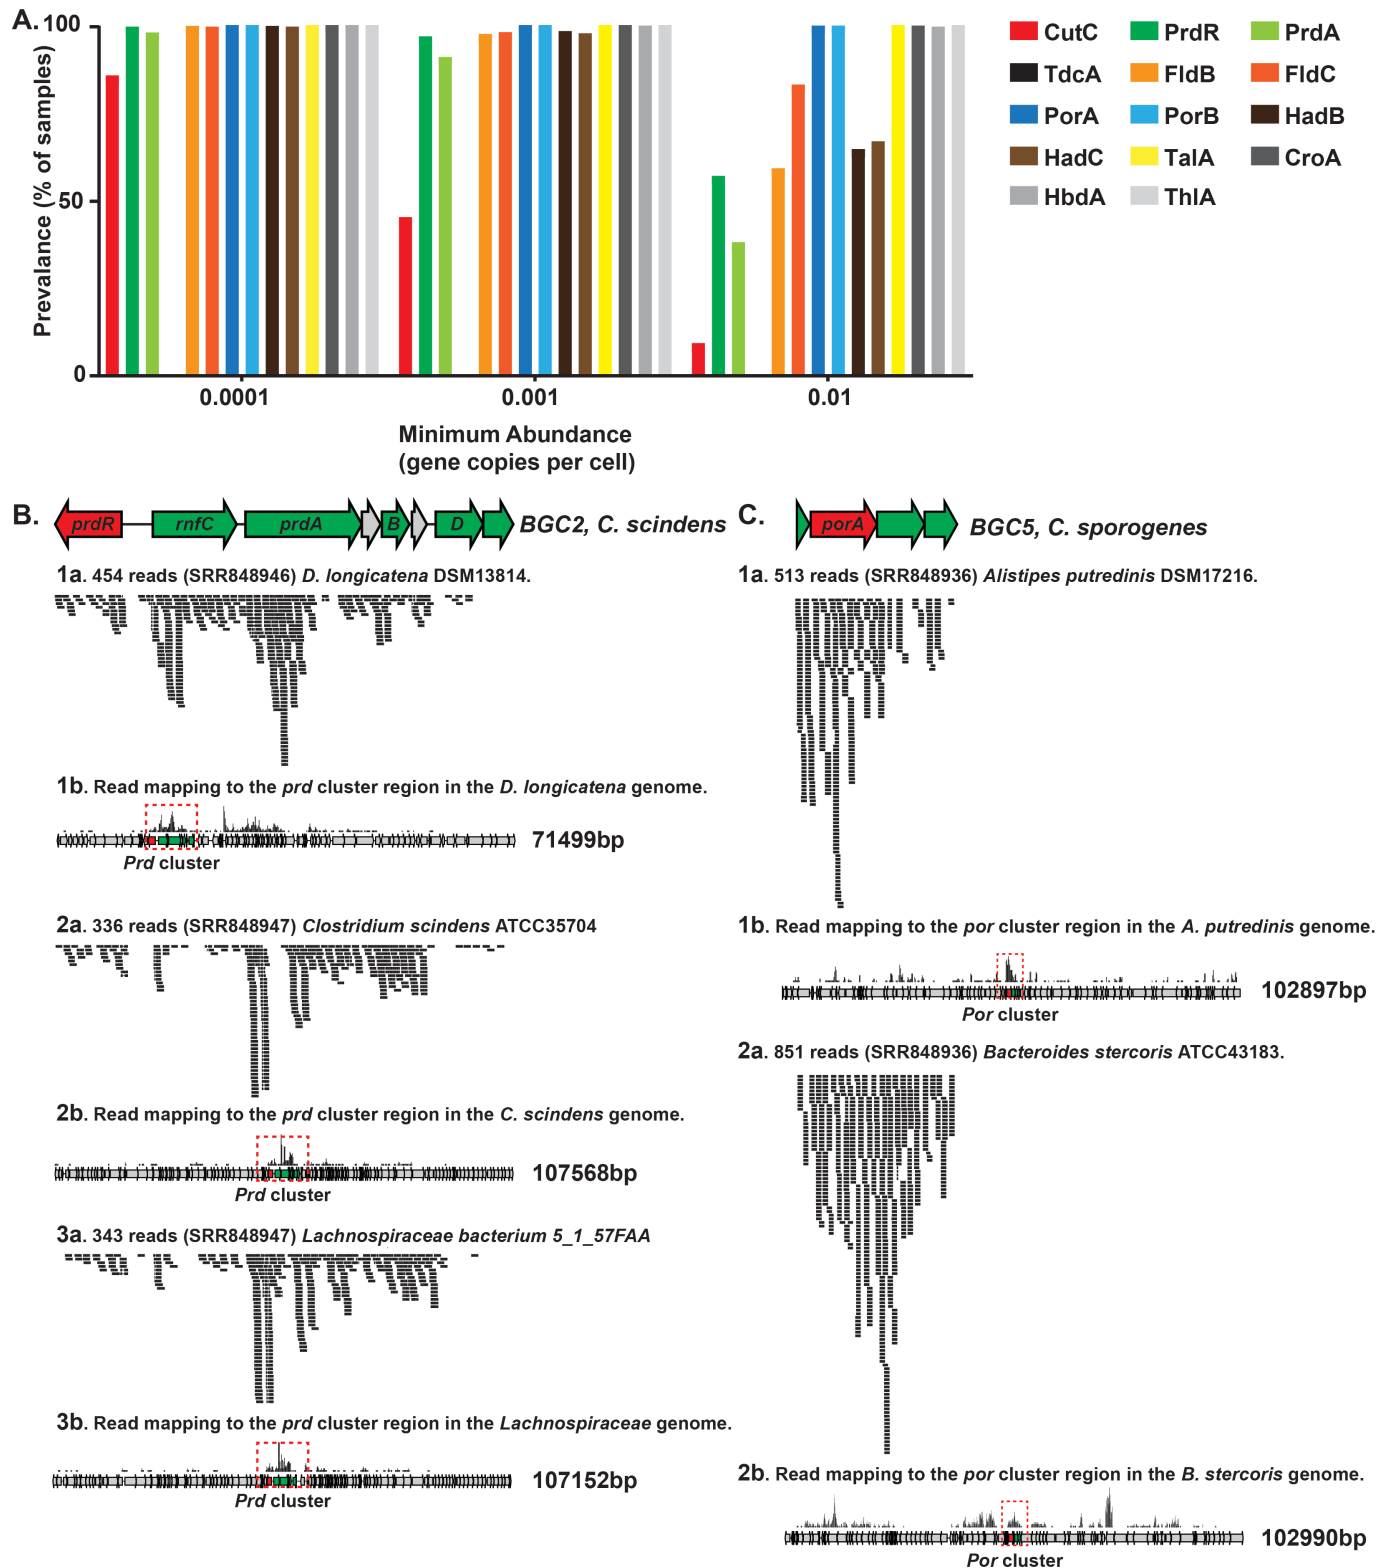

305

306

307

308

309

**Figure S2.** Metagenomic and metatranscriptomic analyses of the gene clusters and their homologs. (A) The key gene in each pathway – one that is predicted to encode an enzyme that catalyzes essential or committed step – was examined by MetaQuery to assess its metagenomic abundance across >2000 public available human stool metagenomes. (B-C) Representative results of metatranscriptomic analyses of

310 MGCs and their homologs in this study. SRR8489XX indicates the accession number of each healthy  
311 human stool metatranscriptomic dataset examined in this study. For example, **Figure S2B, 1a** shows that  
312 454 reads from the metatranscriptomic sample of human subject SRR848946 mapped to the *prd* cluster  
313 in *D. longicatena* DSM13814. This cluster is highly transcribed compared to the surrounding genes in the  
314 *D. longicatena* genome (**Figure S2B, 1b**).  
315

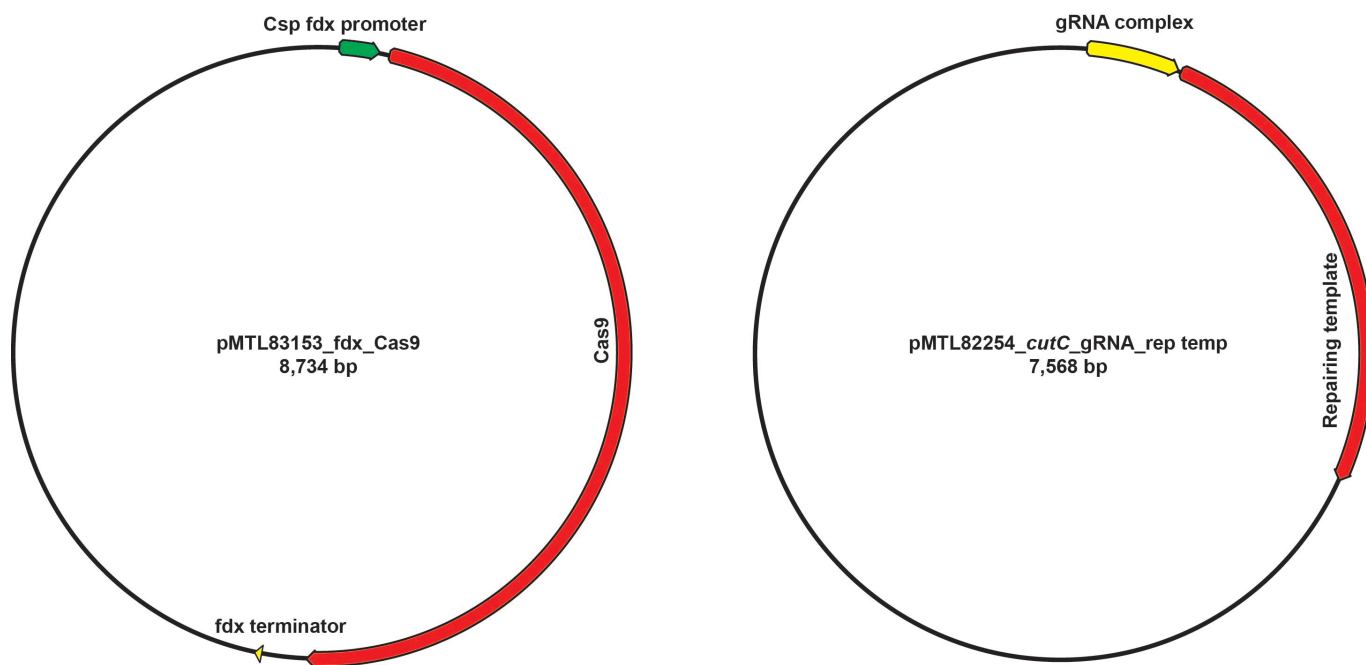

316  
317 **Figure S3.** Schematics of two vectors designed in this study.  
318

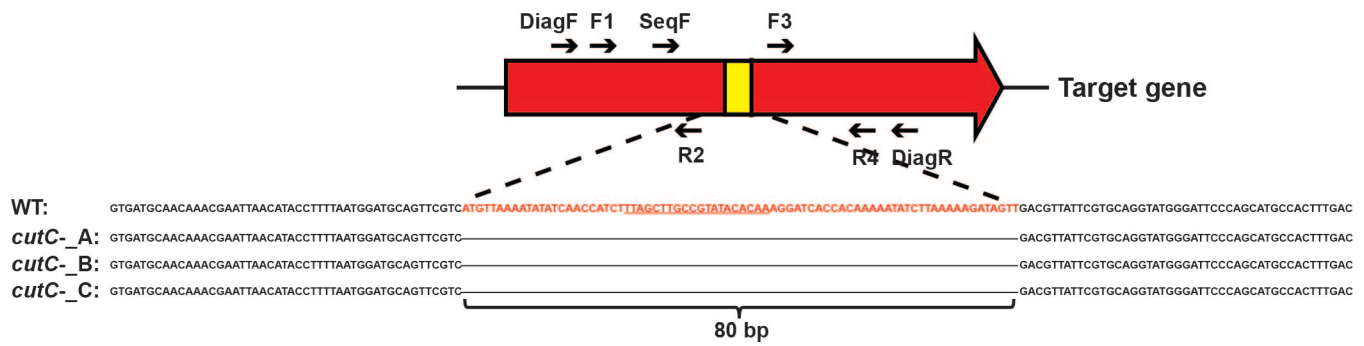

319

320

321

322

323

324

325

**Figure S4.** The scheme for diagnostic PCR used in this study and the sequencing result of three *cutC* mutants compared to wild-type *Cs*. The primer set DiagF+DiagR is used to amplify a sequence from the candidate mutants that carry both pMTL83153\_fdx\_Cas9 and pMTL82254\_gRNA\_rep Temp (**Figure S3**). The amplicons were then sequenced using the primer SeqF and compared to the sequence of WT *Cs* to determine whether the 80 bp sequence (in red) has been deleted in the mutant.

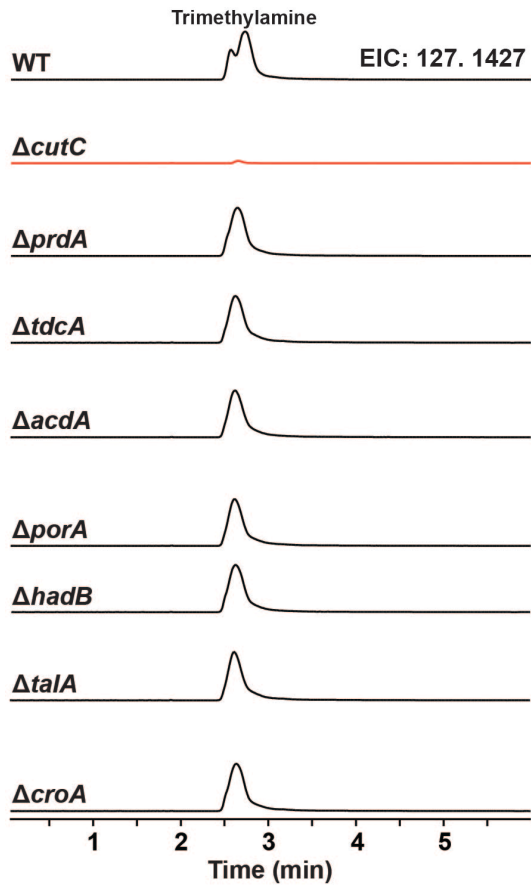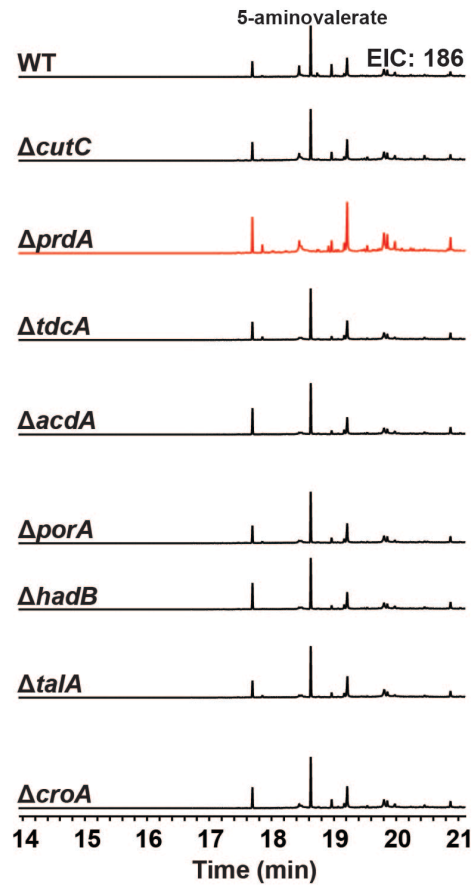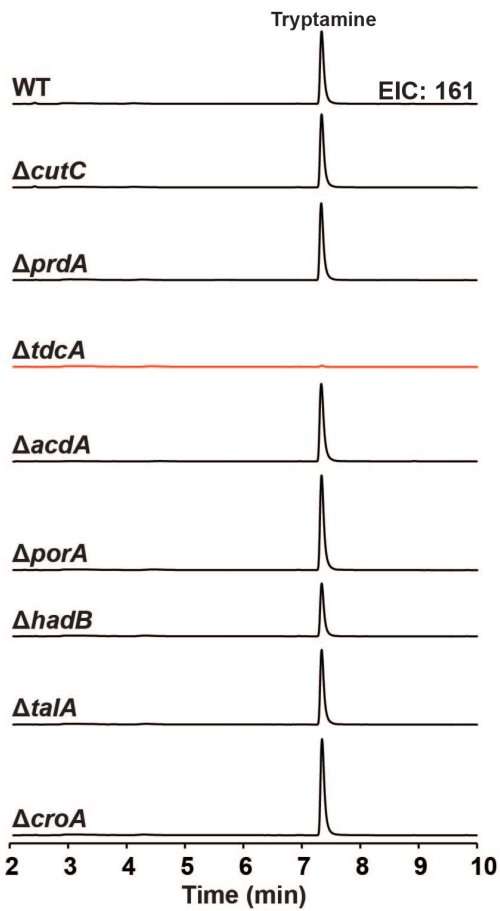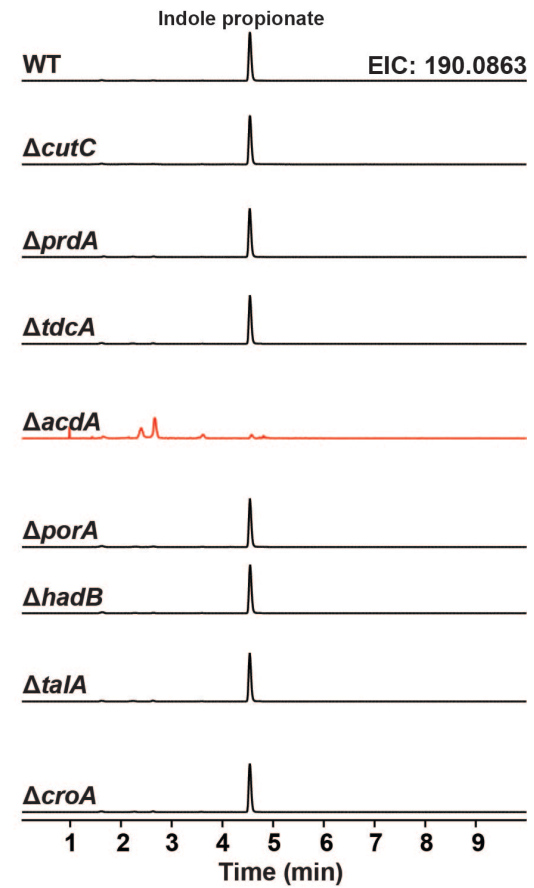

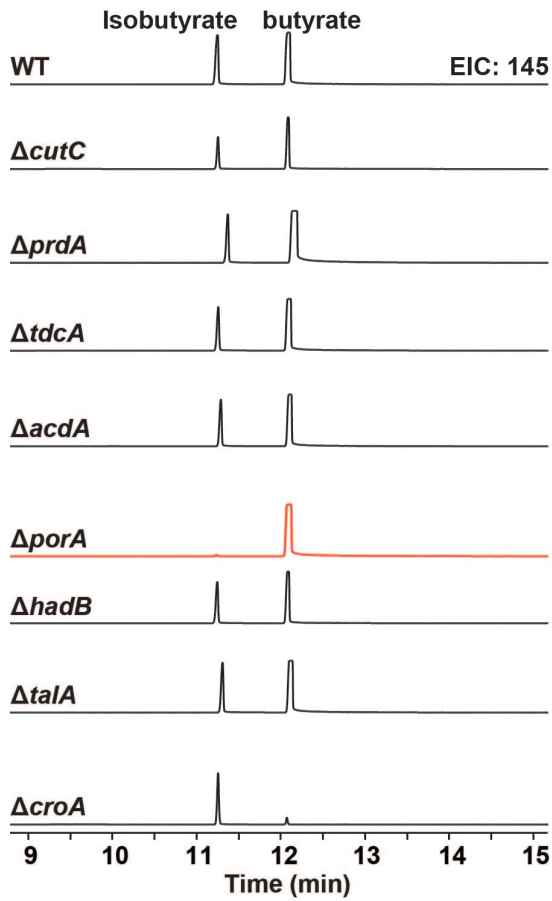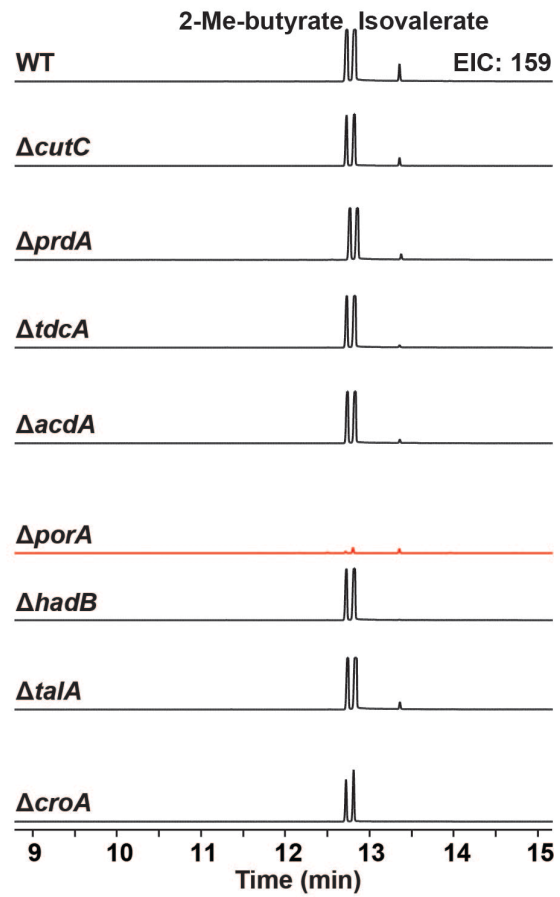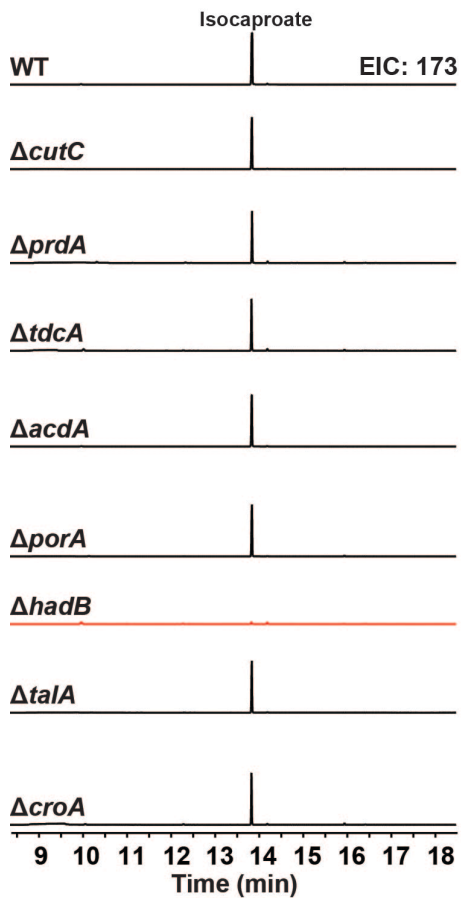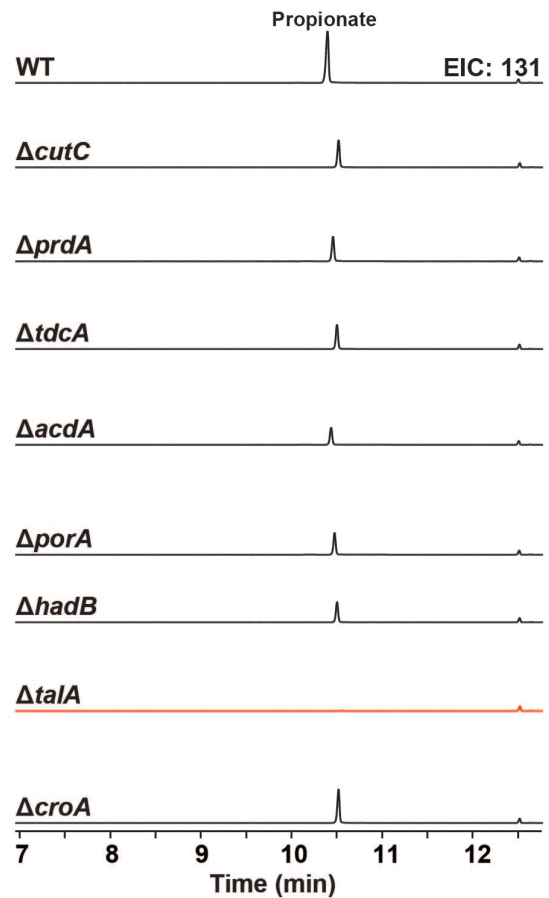

328 **Figure S5.** Complete MS chromatograms from wild-type and mutant strains of Cs cultured in vitro; a  
329 compressed version of these data is shown in **Figure 3.**  
330

331

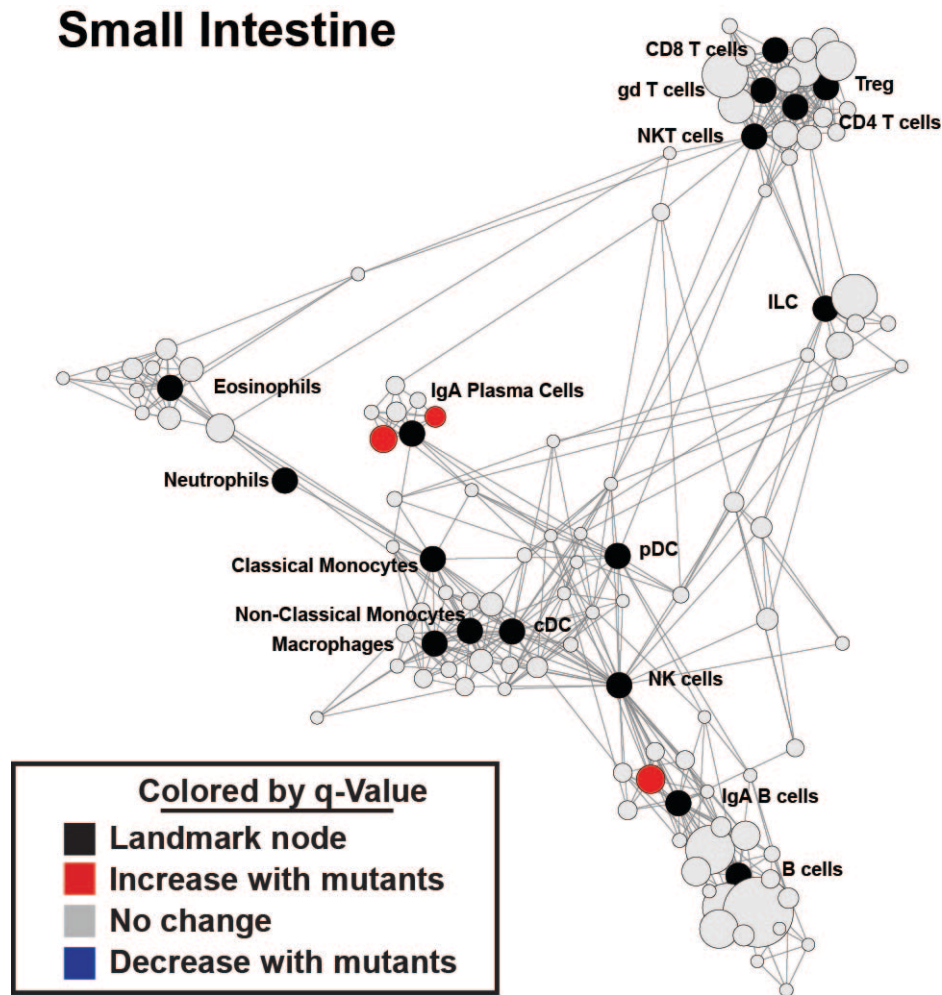

332

333

334 **Figure S6.** Fine detail scaffold maps of mass cytometry data. Scaffold maps of mass cytometry data from  
335 the small intestine and mesenteric lymph nodes of mice colonized with wild-type Cs or the  $\Delta$ porA/ $\Delta$ hadB  
336 mutant. Black nodes represent landmarks – canonical immune cell populations defined manually.  
337 Unsupervised cell clusters are positioned according to their nearest landmark node, with red nodes  
338 representing those immune cell populations that are upregulated in the mutant. The size of these nodes  
339 reflects the number of cells in that particular cluster. Edges in the graphs connect similar cells, with the  
340 length of each edge inversely proportional to that similarity. Cells that are most similar to one another are  
341 thereby connected by a short edge. The  $\Delta$ porA/ $\Delta$ hadB-colonized mice had an increased number of  
342 immunoglobulin A (IgA)-producing plasma cells as shown in the scaffold.

343



344 **Table S1.** Primers used in this study.  
345

| primer                                                                                                | Sequence (5'→3')                                                   |
|-------------------------------------------------------------------------------------------------------|--------------------------------------------------------------------|
| Primers used in the assembly of Cas9 with pMTL83153                                                   |                                                                    |
| 83153_cas9_XbaI_F                                                                                     | GTG TTC <u>TCT AGA</u> ATG GAT AAG AAA TAC TCA ATA GGC TTA GAT ATC |
| 83153_cas9_XhoI_R                                                                                     | GTG TTA <u>CTC GAG</u> TCA GTC ACC TCC TAG CTG AC                  |
| Primers for Clospo_02864 ( <i>cutC</i> ) deletion used in the assembly of gRNA complex with pMTL82254 |                                                                    |
| 02864_cutC_F1                                                                                         | GCA AAG TGA CAG AGG AAA GCC AAG ACC ACG AAC TTA TCG TTG G          |
| 02864_cutC_R2                                                                                         | GAC GAA CTG CAT CCA TTA AAA GG                                     |
| 02864_cutC_F3                                                                                         | CCT TTT AAT GGA TGC AGT TCG TCG ACG TTA TTC GTG CAG GTA TGG        |
| 02864_cutC_R4_AscI                                                                                    | GTG <u>TGG CGC GCC</u> GAT TCC TTG TTC TCC TTC TGG                 |
| 02864_cutC_DiagF                                                                                      | CCA GAT <u>GGA ATG ACA</u> GAA CG                                  |
| 02864_cutC_DiagR                                                                                      | CTC AAC GAA GAA TGC ACT G                                          |
| 02864_cutC_SeqF                                                                                       | CCA AAC AGG TAT GTC TAT AGG AC                                     |
| Primers for Clospo_02527 ( <i>prdR</i> ) deletion                                                     |                                                                    |
| 02527_prdR_F1                                                                                         | GCA AAG TGA CAG AGG AAA GCG CCT CAG CTT TAG AAG CTA TAG G          |
| 02527_prdR_R2                                                                                         | GAC CTT GAC CAA ATA CAA CTA C                                      |
| 02527_prdR_F3                                                                                         | GTA GTT GTA TTT GGT CAA GGT CGG CTT TAC TAT ATG CTC AAG G          |
| 02527_prdR_R4_AscI                                                                                    | GTG <u>TGG CGC GCC</u> GGA GAC ATT TAA GGT TCC TGG                 |
| 02527_prdR_DiagF                                                                                      | GTT GCA GGT ACA CCT CAA GC                                         |
| 02527_prdR_DiagR                                                                                      | CAG CTC CAA CTG TAG CTG                                            |
| 02527_prdR_SeqF                                                                                       | GCT CCA GCA GGA ATG ATT AAT GC                                     |
| Primers for Clospo_02083 ( <i>tdcA</i> ) deletion                                                     |                                                                    |
| 02083_tdcA_F1                                                                                         | GCA AAG TGA CAG AGG AAA GCG CTG CCG TAC ATT GTA C                  |
| 02083_tdcA_R2                                                                                         | CAA GCA CCC TAT GGT ACA G                                          |
| 02083_tdcA_F3                                                                                         | CTG TAC CAT AGG GTG CTT GGA ATC CAC CGA AAG CTC                    |
| 02083_tdcA_R4_AscI                                                                                    | GTG <u>TGG CGC GCC</u> GAC ATA AGC AAT AAG GGG G                   |
| 02083_tdcA_DiagF                                                                                      | GTG TAG GGT TAG GGT TTC                                            |
| 02083_tdcA_DiagR                                                                                      | GGC CAC TCT ATT GTA ATT TC                                         |
| 02083_tdcA_SeqF                                                                                       | CCA TAA CGA CTA TCT TAT AC                                         |
| Primers for Clospo_00312 ( <i>acdA</i> ) deletion                                                     |                                                                    |
| 00312_acdA_F1                                                                                         | GCA AAG TGA CAG AGG AAA GCC TGT GAC CCA GAG GAA TAT GA             |
| 00312_acdA_R2                                                                                         | ATC AGA TAT TGG AGC TCC TG                                         |
| 00312_acdA_F3                                                                                         | CAG GAG CTC CAA TAT CTG ATG GTA AGC CTG AAG ACA AG                 |
| 00312_acdA_R4_AscI                                                                                    | GTG <u>TGG CGC GCC</u> ACCTCC AAC TGT CAT GTA GC                   |
| 00312_acdA_DiagF                                                                                      | ACT CCA GAT GCG AAT ACA CC                                         |
| 00312_acdA_DiagR                                                                                      | TTT TAT CTG GCG CGA AGG                                            |
| 00312_acdA_SeqF                                                                                       | CCA AAT TCA TTG CTT GGC AC                                         |
| Primers for Clospo_00147 ( <i>porA</i> ) deletion                                                     |                                                                    |
| 00147_porA_F1                                                                                         | GCA AAG TGA CAG AGG AAA GCG GAG CAA CAG TAC TTG GTC                |
| 00147_porA_R2                                                                                         | GGA CCT CCT CTA ACG ATG                                            |
| 00147_porA_F3                                                                                         | CAT CGT TAG AGG AGG TCC CAG TAT TTG CAC CTG C                      |
| 00147_porA_R4_AscI                                                                                    | GTG <u>TGG CGC GCC</u> CTT GAG GAG TTA ATC CCC                     |
| 00147_porA_DiagF                                                                                      | GGT TGT ACC TGG TGA AG                                             |
| 00147_porA_DiagR                                                                                      | CCG TAA GAT GGT AAC CAT G                                          |
| 00147_porA_SeqF                                                                                       | GCC CAG ATT GTG TAA TAA CAG                                        |
| Primers for Clospo_02757 ( <i>hadB</i> ) deletion                                                     |                                                                    |
| 02757_hadB_F1                                                                                         | GCA AAG TGA CAG AGG AAA GCG CAG GCA TGA GTT TAG CAG C              |
| 02757_hadB_R2                                                                                         | GAA GTT GAC CAA CCA ACC GG                                         |
| 02757_hadB_F3                                                                                         | CCG GTT GGT TGG TCA ACT TCG AGG CTG CAG AAA GTG CTG G              |
| 02757_hadB_R4_AscI                                                                                    | GTG <u>TGG CGC GCC</u> GTA TCG CAC ATT CCA GG                      |
| 02757_hadB_DiagF                                                                                      | GCC TGG ATT TGA CTA TAC TG                                         |
| 02757_hadB_DiagR                                                                                      | GTT TAG CCG CTT CAT CTA C                                          |
| 02757_hadB_SeqF                                                                                       | CAA GAC CAC ATA TGA CAG                                            |
| Primers for Clospo_00066 ( <i>talA</i> ) deletion                                                     |                                                                    |
| 00066_talA_F1                                                                                         | GCA AAG TGA CAG AGG AAA GCG GTA GGT GCA AAT GAA ACA GG             |
| 00066_talA_R2                                                                                         | GCTATTGTGCCTTGACCTGC                                               |
| 00066_talA_F3                                                                                         | GCAGGTCAAGGCACAATAGC TCAGGAATAGCTGTAGC                             |

|                     |                                         |
|---------------------|-----------------------------------------|
| 00066_ talA_R4_AscI | GTG TGG CGC GCC CTA TAT GCC AAC CTG GTC |
| 00066_ talA_DiagF   | GCT ACA AAT GCA GAG ATA GG              |
| 00066_ talA_DiagR   | GTT CTT GCC TCA CTT TGA GC              |
| 00066_ talA_SeqF    | GGG AGA TAG ATG ATC ATG G               |

---

Primers for Clospo\_00417 (*croA*) deletion

|                     |                                                         |
|---------------------|---------------------------------------------------------|
| 00417_ croA_F1      | GCA AAG TGA CAG AGG AAA GCG GAT TAG GGG AGA AGA AGA TGC |
| 00417_ croA_R2      | CTT ATG TCG CAA CTC ATT GC                              |
| 00417_ croA_F3      | GCA ATG AGT TGC GAC ATA AGC ACG CTT AGT AGG GTT AAG     |
| 00417_ croA_R4_AscI | GTG TGG CGC GCC GGT CCA ATA GGA TGA TTA GCT CC          |
| 00417_ croA_DiagF   | GCT AAA TTA TTG CCA CAG TCA CCG GG                      |
| 00417_ croA_DiagR   | CCT ATA GGT GTT CTT ACA GCA C                           |
| 00417_ croA_SeqF    | GGC CTT TAT AGC TGG AGC TGA TAT C                       |

---

346

347

348 **Table S2.** Bacterial strains used in this study.  
349

| Bacterial strains                           | Gene mutation(s)           | Genotype                                            |
|---------------------------------------------|----------------------------|-----------------------------------------------------|
| <i>E. coli</i> s17                          | -                          | -                                                   |
| <i>Clostridium sporogenes</i><br>ATCC15579  | -                          | -                                                   |
| MFCJ13 ( <i>E. coli</i> s17)                | None                       | Carrying pMTL83153_fdx_Cas9 (P1, <b>Figure S3</b> ) |
| MFCJ14 ( <i>E. coli</i> s17)                | None                       | Carrying pMTL82254_cutC_gRNA_rep temp (P2)          |
| MFCJ15 ( <i>E. coli</i> s17)                | None                       | Carrying pMTL82254_prdR_gRNA_rep temp (P2)          |
| MFCJ16 ( <i>E. coli</i> s17)                | None                       | Carrying pMTL82254_tdcA_gRNA_rep temp (P2)          |
| MFCJ17 ( <i>E. coli</i> s17)                | None                       | Carrying pMTL82254_acdA_gRNA_rep temp (P2)          |
| MFCJ18 ( <i>E. coli</i> s17)                | None                       | Carrying pMTL82254_porA_gRNA_rep temp (P2)          |
| MFCJ19 ( <i>E. coli</i> s17)                | None                       | Carrying pMTL82254_hadB_gRNA_rep temp (P2)          |
| MFCJ20 ( <i>E. coli</i> s17)                | None                       | Carrying pMTL82254_talA_gRNA_rep temp (P2)          |
| MFCJ21 ( <i>E. coli</i> s17)                | None                       | Carrying pMTL82254_croA_gRNA_rep temp (P2)          |
| MFCJ22 ( <i>C. sporogenes</i><br>ATCC15579) | None                       | Carrying pMTL82254_cutC_gRNA_rep temp (P2)          |
| MFCJ23 ( <i>C. sporogenes</i><br>ATCC15579) | None                       | Carrying pMTL82254_prdR_gRNA_rep temp (P2)          |
| MFCJ24 ( <i>C. sporogenes</i><br>ATCC15579) | None                       | Carrying pMTL82254_tdcA_gRNA_rep temp (P2)          |
| MFCJ25 ( <i>C. sporogenes</i><br>ATCC15579) | None                       | Carrying pMTL82254_acdA_gRNA_rep temp (P2)          |
| MFCJ26 ( <i>C. sporogenes</i><br>ATCC15579) | None                       | Carrying pMTL82254_porA_gRNA_rep temp (P2)          |
| MFCJ27 ( <i>C. sporogenes</i><br>ATCC15579) | None                       | Carrying pMTL82254_hadB_gRNA_rep temp (P2)          |
| MFCJ28 ( <i>C. sporogenes</i><br>ATCC15579) | None                       | Carrying pMTL82254_talA_gRNA_rep temp (P2)          |
| MFCJ29 ( <i>C. sporogenes</i><br>ATCC15579) | None                       | Carrying pMTL82254_croA_gRNA_rep temp (P2)          |
| MFCJ30 ( <i>C. sporogenes</i><br>ATCC15579) | $\Delta cutC$              | $\Delta cutC$                                       |
| MFCJ31 ( <i>C. sporogenes</i><br>ATCC15579) | $\Delta prdR$              | $\Delta prdR$                                       |
| MFCJ32 ( <i>C. sporogenes</i><br>ATCC15579) | $\Delta tdcA$              | $\Delta tdcA$                                       |
| MFCJ33 ( <i>C. sporogenes</i><br>ATCC15579) | $\Delta acdA$              | $\Delta acdA$                                       |
| MFCJ34 ( <i>C. sporogenes</i><br>ATCC15579) | $\Delta porA$              | $\Delta porA$                                       |
| MFCJ35 ( <i>C. sporogenes</i><br>ATCC15579) | $\Delta hadB$              | $\Delta hadB$                                       |
| MFCJ36 ( <i>C. sporogenes</i><br>ATCC15579) | $\Delta talA$              | $\Delta talA$                                       |
| MFCJ37 ( <i>C. sporogenes</i><br>ATCC15579) | $\Delta croA$              | $\Delta croA$                                       |
| MFCJ37 ( <i>C. sporogenes</i><br>ATCC15579) | $\Delta porA/ \Delta hadB$ | $\Delta porA/ \Delta hadB$                          |

350  
351

352 **Table S3.** Antibody panel used for mass cytometry experiments.  
353

| Channel | Element | Protein    | Clone       | Vendor      | Titrated Conc. (ug/ml) |
|---------|---------|------------|-------------|-------------|------------------------|
| 113     | In      | Ter119     | TER119      | Biolegend   | 3                      |
| 115     | In      | CD45       | 30-F11      | Biolegend   | 3                      |
| 139     | La      | Ly6G       | 1A8         | Biolegend   | 1.5                    |
| 140     | Ce      | IgD        | 11-26c.2a   | BD          | 2.5                    |
| 141     | Pr      | IgA        | RMA-1       | Biolegend   | 2.5                    |
| 142     | Nd      | CD49b      | HMa2        | Biolegend   | 0.1875                 |
| 143     | Nd      | CD11c      | HL3         | BD          | 0.75                   |
| 144     | Nd      | CD43       | S7          | BD          | 3                      |
| 145     | Nd      | CD27       | LG.3A10     | Biolegend   | 2.8                    |
| 146     | Nd      | CD138      | 281-2       | Biolegend   | 1.5                    |
| 147     | Sm      | PD-L1      | 10F.9G2     | Biolegend   | 3                      |
| 148     | Nd      | CD103      | 2E7         | Biolegend   | 2.4                    |
| 149     | Sm      | SiglecF    | E50-2440    | BD          | 1.5                    |
| 150     | Nd      | PDCA-1     | 120g8       | Imgenex     | 1.5                    |
| 151     | Eu      | Ly6C       | HK1.4       | Biolegend   | 0.75                   |
| 152     | Sm      | Ki67       | SolA15      | eBioscience | 0.75                   |
| 153     | Eu      | CD11b      | M1/70       | Biolegend   | 0.75                   |
| 154     | Sm      | cKit       | 2B8         | Biolegend   | 1.5                    |
| 155     | Gd      | CD8        | 53-6.7      | Biolegend   | 3                      |
| 156     | Gd      | CD4        | RM4-5       | Biolegend   | 3                      |
| 157     | Gd      | CD3        | 17A2        | BD          | 1.5                    |
| 158     | Gd      | B220       | RA3-6B2     | Biolegend   | 1.5                    |
| 159     | Tb      | PD-1       | 29F.1A12    | Biolegend   | 3                      |
| 160     | Gd      | NK1.1      | PK136       | Biolegend   | 6                      |
| 161     | Dy      | T-bet      | 04-46       | BD          | 3                      |
| 162     | Dy      | TCRgd      | GL3         | Biolegend   | 1.5                    |
| 163     | Dy      | CD62L-FITC | MEL-14      | Biolegend   | 3.5                    |
| 164     | Dy      | CD86       | GL-1        | Biolegend   | 0.75                   |
| 165     | Ho      | CD69       | H1.2F3      | Biolegend   | 6                      |
| 166     | Er      | FcER1a     | MAR-1       | Biolegend   | 1.5                    |
| 167     | Er      | Foxp3      | NRRF-30     | eBioscience | 6                      |
| 168     | Er      | RORgt      | B2D         | eBioscience | 1.5                    |
| 169     | Tm      | F4/80      | BM8         | Biolegend   | 1.5                    |
| 170     | Er      | CD115      | AFS98       | Biolegend   | 0.75                   |
| 171     | Yb      | CD64       | X54-5/7.1   | Biolegend   | 6                      |
| 172     | Yb      | GATA3      | L50-823     | BD          | 3                      |
| 173     | Yb      | CD19       | 6D5         | Biolegend   | 0.75                   |
| 174     | Yb      | IgM        | RMM-1       | Biolegend   | 2.25                   |
| 175     | Lu      | CD44       | IM7         | BD          | 0.375                  |
| 176     | Yb      | CD90       | G7          | Biolegend   | 0.5                    |
| 209     | Bi      | MHC II     | M5/114.15.2 | Biolegend   | 0.75                   |

354  
355

356 **Table S4.** Gene regions deleted in this study.

| Gene                          | Deleted Sequence                                                                                           |
|-------------------------------|------------------------------------------------------------------------------------------------------------|
| <i>cutC</i><br>(Clospo_02864) | ATGTTAAAATATATCAACCATCTTTAGCTTGCCGTATACACAAAGGATCACCACAAAAATATCTTA<br>AAAAGATAGTT                          |
| <i>prdR</i><br>(Clospo_02757) | AAGTAGATAGATCACCTTGTGGAAGTGGTACAAGTGCTAAAAT                                                                |
| <i>tdcA</i><br>(Clospo_02083) | CAACATTTTATGACCATCTAATGTTATAGAAGTACATTTTATTAGAAAAATCCGTTTTACTC<br>TTTATTATCTATAGGATATAT                    |
| <i>acdA</i><br>(Clospo_00312) | AATATCATAGTGTTTCGCAAAAACAGATATGAGCAAAGGAACAAAGGGAATTACTACATTTATAGT<br>AGATAGTAAACAAGAAGGTGTATCTTTT         |
| <i>porA</i><br>(Clospo_00147) | AGGATTAGGAAGTATTCAGCCAGCACAATCAGATTATTTCCAAGCAACAAAAGCAAGCGGACA<br>CGGTGATTTTAATATGC                       |
| <i>hadB</i><br>(Clospo_02757) | TGTATTTCCACAGGAATTAGTAGAACTTTTGGTTTAGACGTATTATATCCAGAAAACCAAGCC<br>GCTGGGGTTGCAGCTAAGAAAGAGTCCTTATCACTTTGT |
| <i>talA</i><br>(Clospo_00066) | TTTAGAAATATTAGAAGAAATAGAGGATATAGATGCTATAATAGTTCCAATAGGAGGAGGAGGAC<br>TAATATCAGGAATAGCTGTAG                 |
| <i>croA</i><br>(Clospo_00417) | AATAGCTTCAGAAAAAGCTAAATTCGGTCAACCAGAAGTAGGTTTGGGAATAACTCCAGGATT<br>CGGGGGAACACAAAGGCTTT                    |

357

358

359 **REFERENCES**

- 360 1. S. Nayfach, M. A. Fischbach, K. S. Pollard, MetaQuery: a web server for rapid annotation and  
361 quantitative analysis of specific genes in the human gut microbiome. *Bioinformatics*. **31**, 3368–  
362 3370 (2015).
- 363 2. L. A. David *et al.*, Diet rapidly and reproducibly alters the human gut microbiome. *Nature*. **505**,  
364 559–563 (2014).
- 365 3. A. de Jong, H. Pietersma, M. Cordes, O. P. Kuipers, J. Kok, PePPER: a webserver for prediction  
366 of prokaryote promoter elements and regulons. *BMC Genomics*. **13** (2012), doi:10.1186/1471-  
367 2164-13-299.
- 368 4. J. T. Heap, O. J. Pennington, S. T. Cartman, N. P. Minton, A modular system for Clostridium  
369 shuttle plasmids. *Journal of microbiological methods*. **78**, 79–85 (2009).
- 370 5. S. Craciun, E. P. Balskus, Microbial conversion of choline to trimethylamine requires a glyceryl  
371 radical enzyme. *Proceedings of the National Academy of Sciences of the United States of  
372 America*. **109**, 21307–21312 (2012).
- 373 6. L. M. Heaney, D. J. L. Jones, R. J. Mbasu, L. L. Ng, T. Suzuki, High mass accuracy assay for  
374 trimethylamine N-oxide using stable-isotope dilution with liquid chromatography coupled to  
375 orthogonal acceleration time of flight mass spectrometry with multiple reaction monitoring.  
376 *Analytical and Bioanalytical Chemistry*. **408**, 797–804 (2016).
- 377 7. Z. Wang *et al.*, Measurement of trimethylamine-N-oxide by stable isotope dilution liquid  
378 chromatography tandem mass spectrometry. *Anal. Biochem*. **455**, 35–40 (2014).
- 379 8. X. Zheng *et al.*, A targeted metabolomic protocol for short-chain fatty acids and branched-chain  
380 amino acids. *arXiv*. **9**, 818–827 (2013).
- 381 9. E. R. Zunder *et al.*, Palladium-based mass tag cell barcoding with a doublet-filtering scheme and  
382 single-cell deconvolution algorithm. *Nat Protoc*. **10**, 316–333 (2015).
- 383 10. R. Finck *et al.*, Normalization of mass cytometry data with bead standards. *Cytometry A*. **83**, 483–  
384 494 (2013).
- 385 11. T. Xu *et al.*, Efficient genome editing in clostridium cellulolyticum via CRISPR-Cas9 nickase.  
386 *Applied and environmental microbiology*. **81**, 4423–4431 (2015).
- 387 12. Y. Wang *et al.*, Markerless chromosomal gene deletion in Clostridium beijerinckii using  
388 CRISPR/Cas9 system. *Journal of biotechnology*. **200**, 1–5 (2015).
- 389 13. Y. Wang *et al.*, Bacterial Genome Editing with CRISPR-Cas9: Deletion, Integration, Single  
390 Nucleotide Modification, and Desirable “Clean” Mutant Selection in Clostridium beijerinckii as an  
391 Example. *ACS Synth. Biol*. **5**, 721–732 (2016).

392
